# Supplementary material for: Synthesis of strained 1,2-diazetidines via [3 + 1] cycloaddition of C,N-cyclic azomethine imines with isocyanides and synthetic derivation
Source: Royal Society of Chemistry journal article supplement (doi:10.1039/d1qo00130b), 2021-01-01
Supplement: d1qo00130b1.pdf [file d1qo00130b1.pdf]

## Supporting Information

### **Synthesis of strained 1,2-diazetidines via [3+1] cycloaddition of C,N-cyclic azomethine imines with isocyanides and synthetic derivation**

Wen-Bin Cao,<sup>a</sup> Shuai Jiang,<sup>a</sup> Hai-Yan Li,<sup>b</sup> Xiao-Ping Xu<sup>\*a</sup> and Shun-Jun Ji<sup>\*a</sup>

<sup>a</sup> Key Laboratory of Organic Synthesis of Jiangsu Province, College of Chemistry, Chemical Engineering and Materials Science & Collaborative Innovation Center of Suzhou Nano Science and Technology, Soochow University, Suzhou 215123, China

<sup>b</sup> Analysis and Testing Center, Soochow University, Suzhou 215123, China

## Table of Contents

|                                                                                         |    |
|-----------------------------------------------------------------------------------------|----|
| 1. $^1\text{H}$ , $^{13}\text{C}$ and $^{19}\text{F}$ NMR spectra of all products ..... | 3  |
| 2. Crystal data and structure refinement .....                                          | 38 |

# 1. $^1\text{H}$ , $^{13}\text{C}$ and $^{19}\text{F}$ NMR spectra of all products

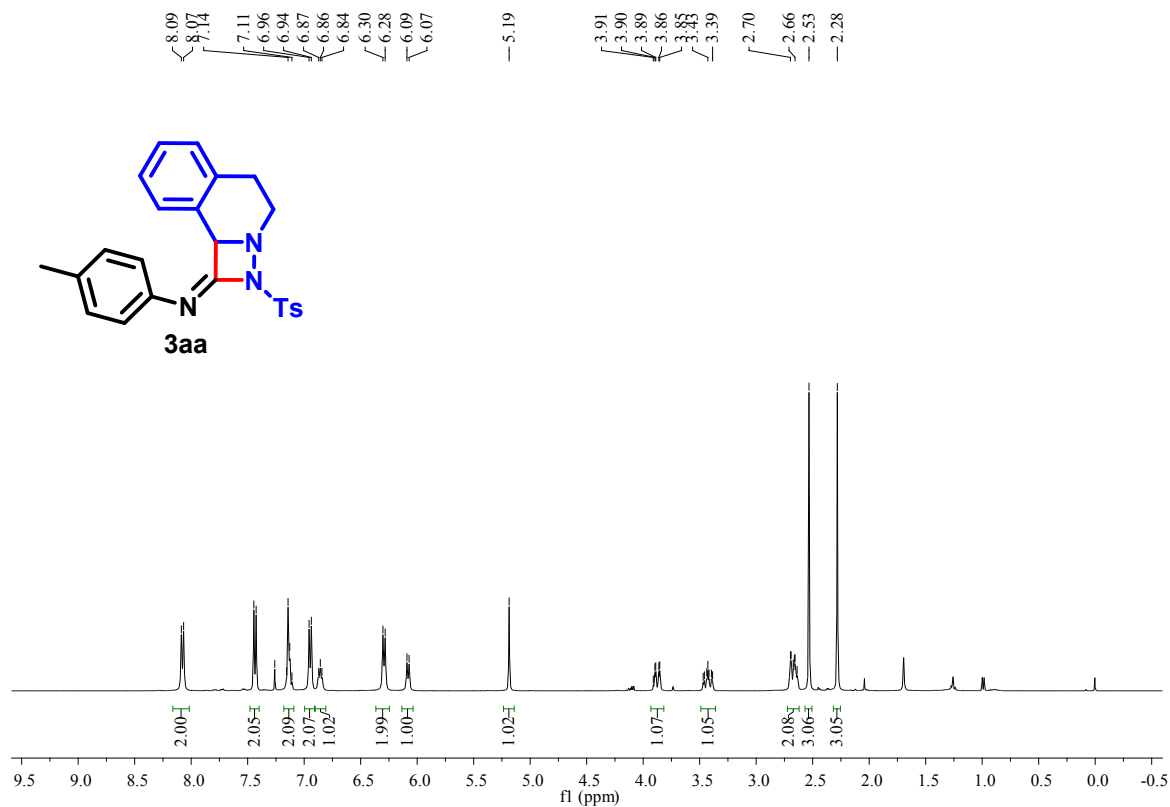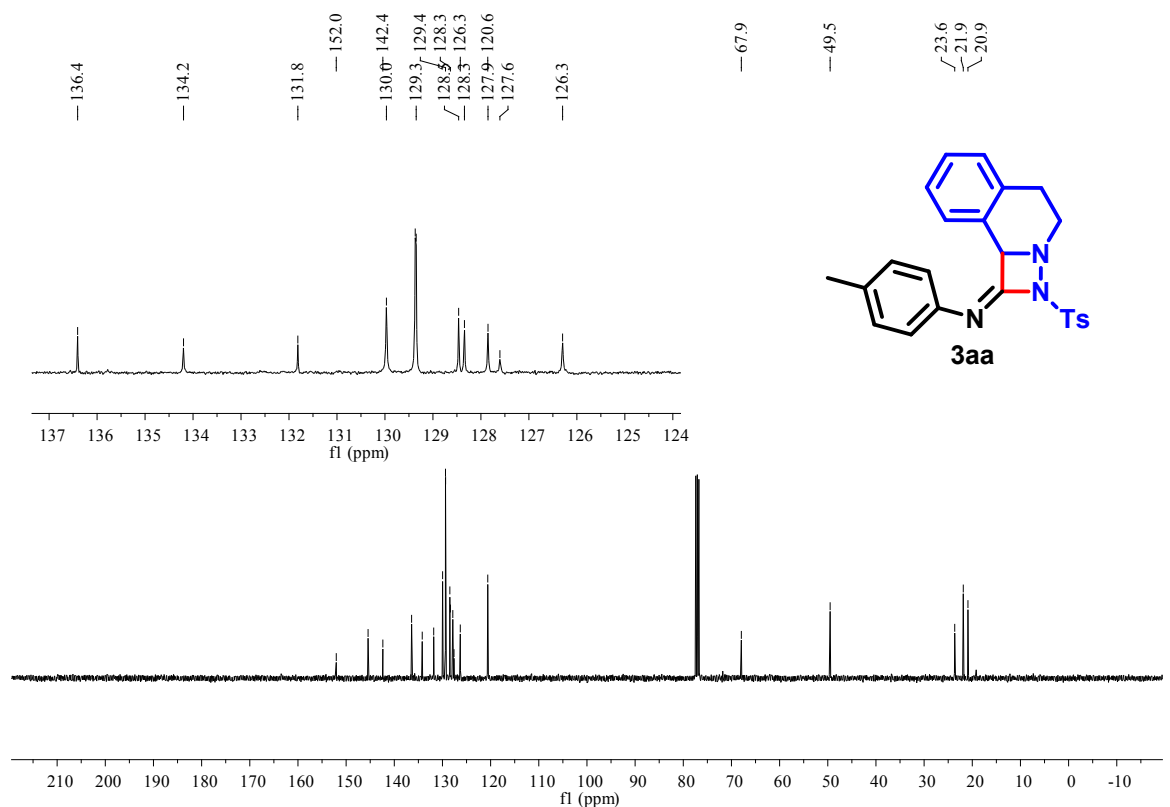

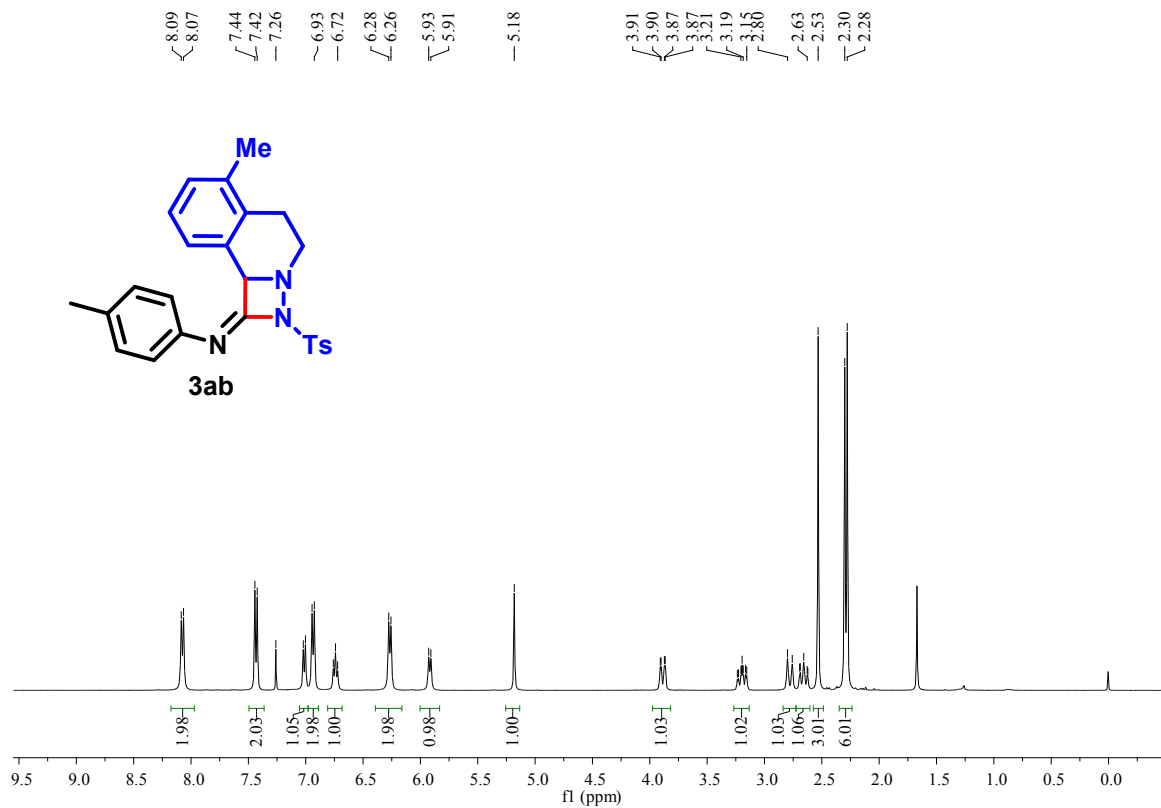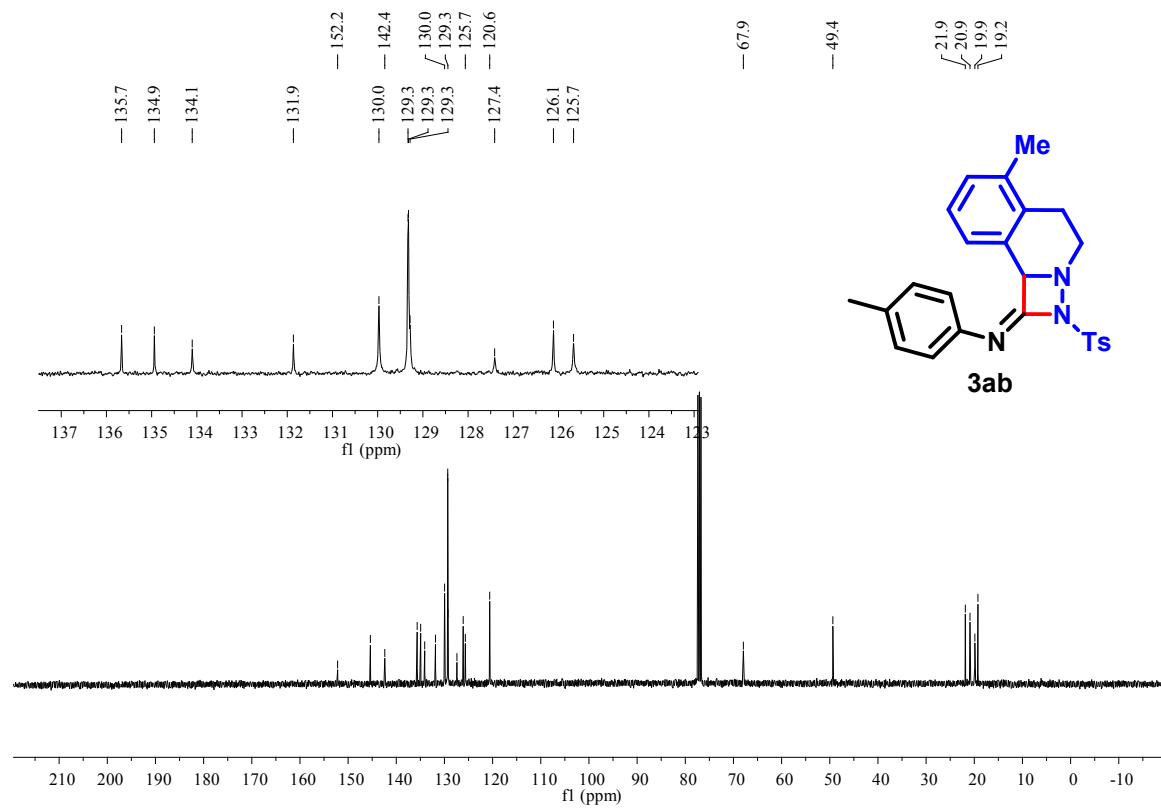

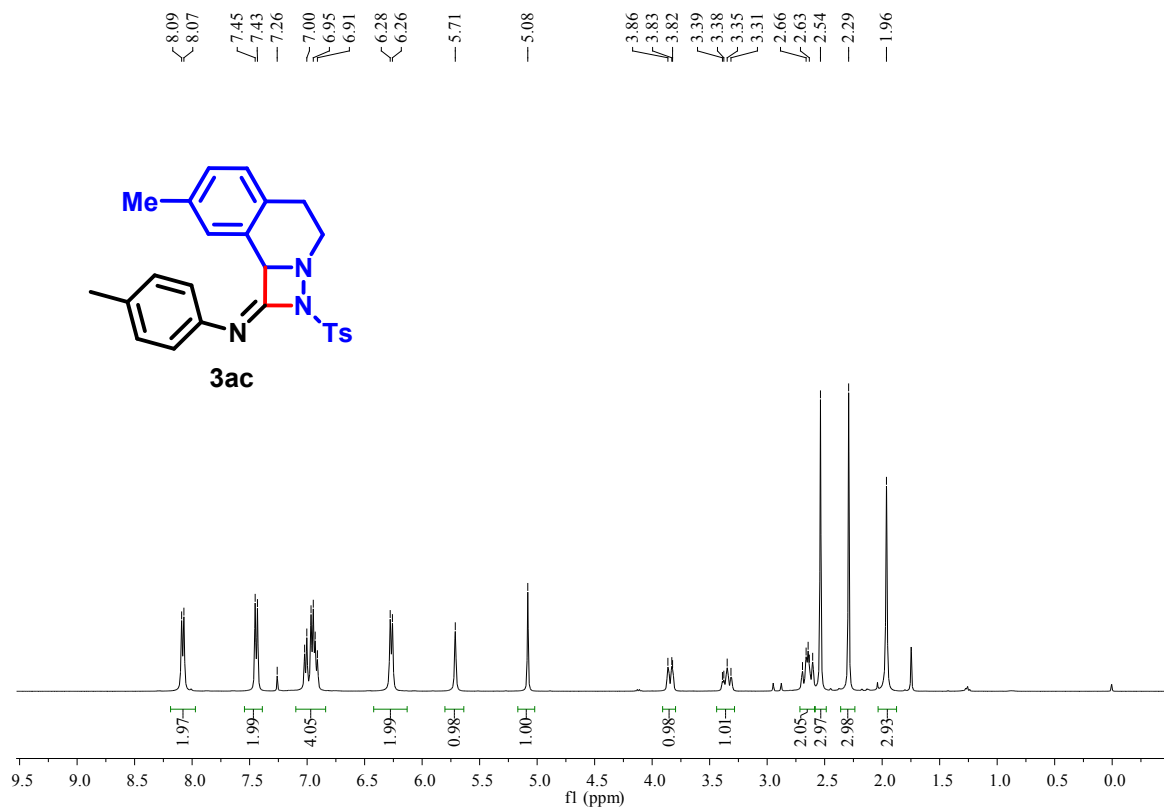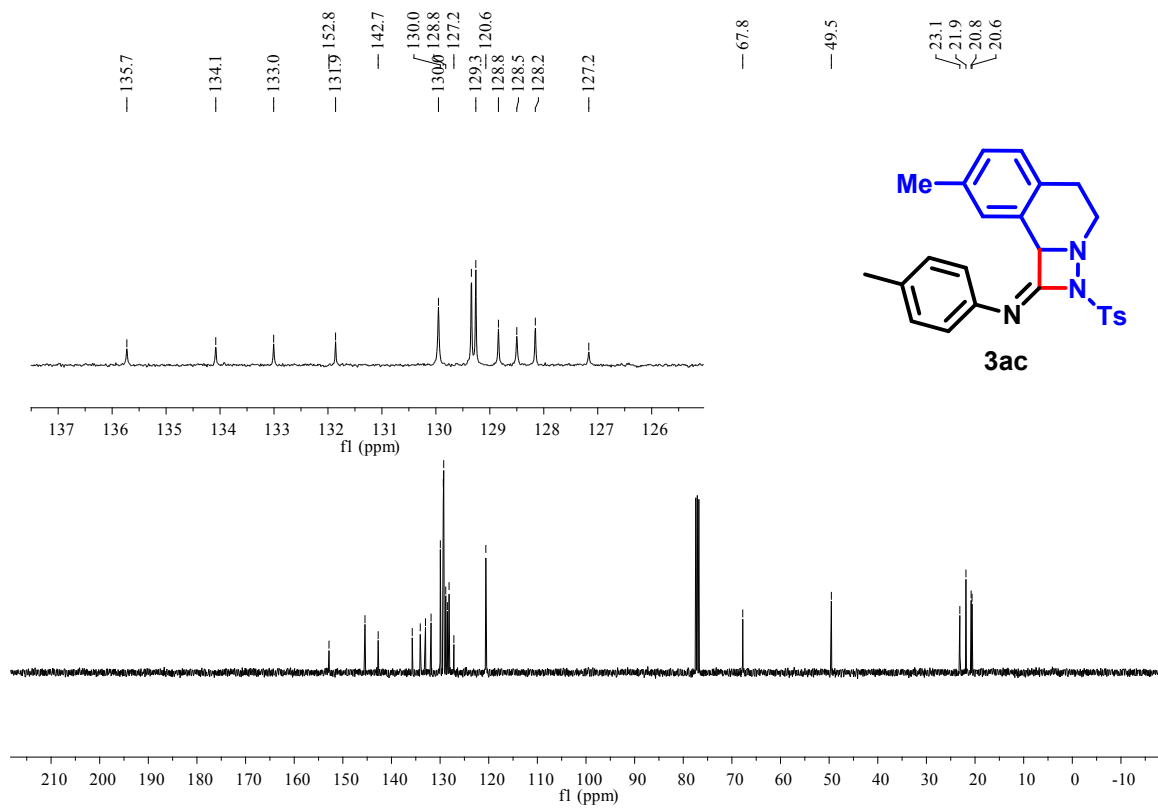

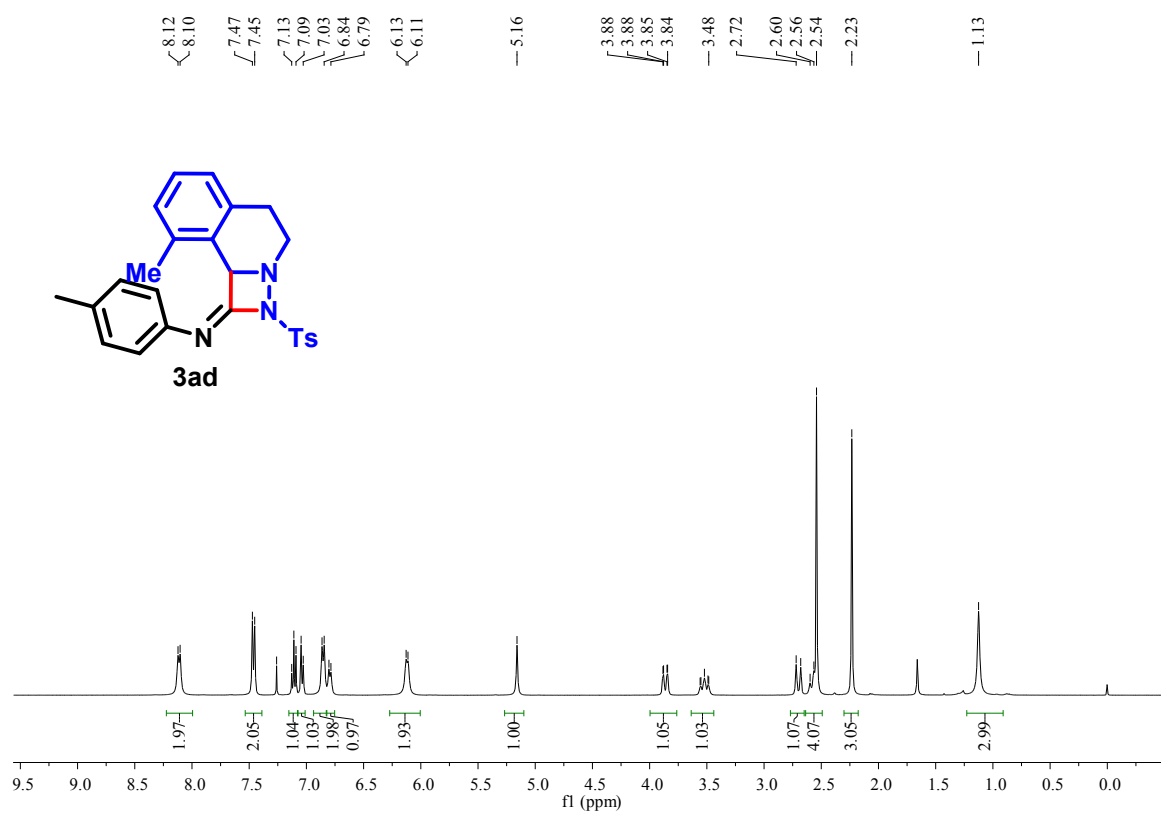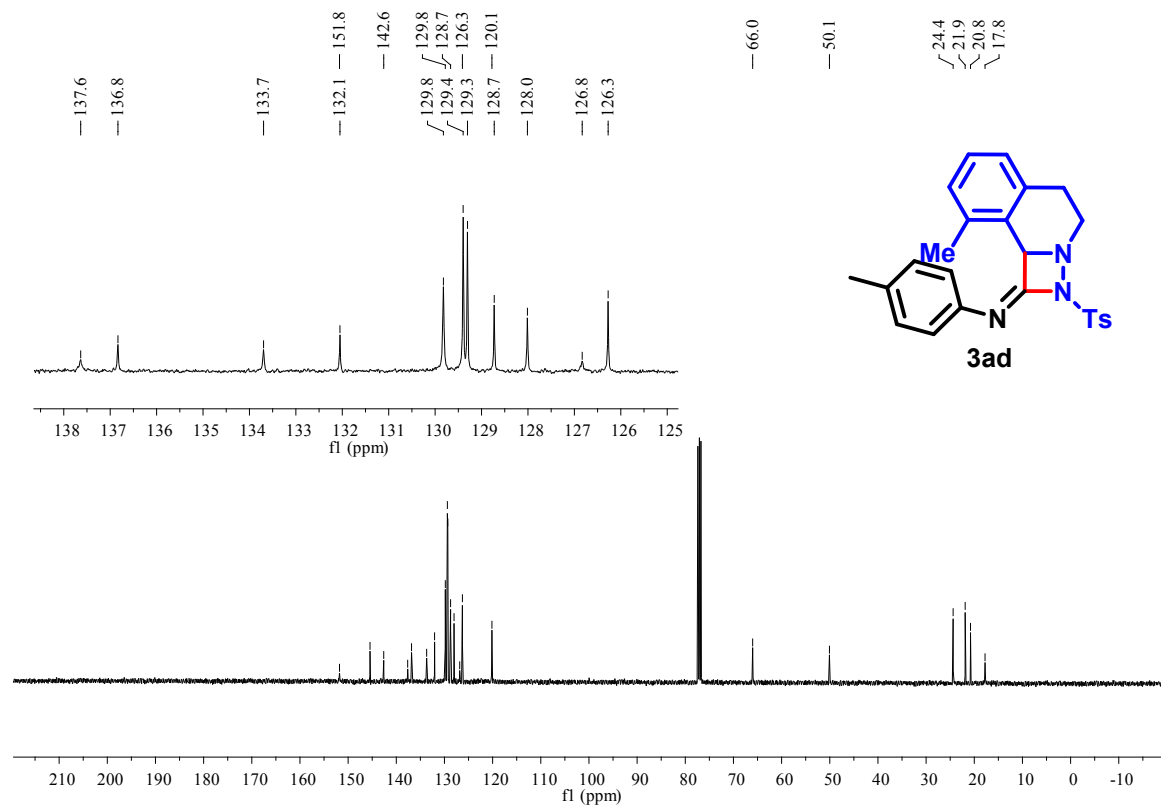

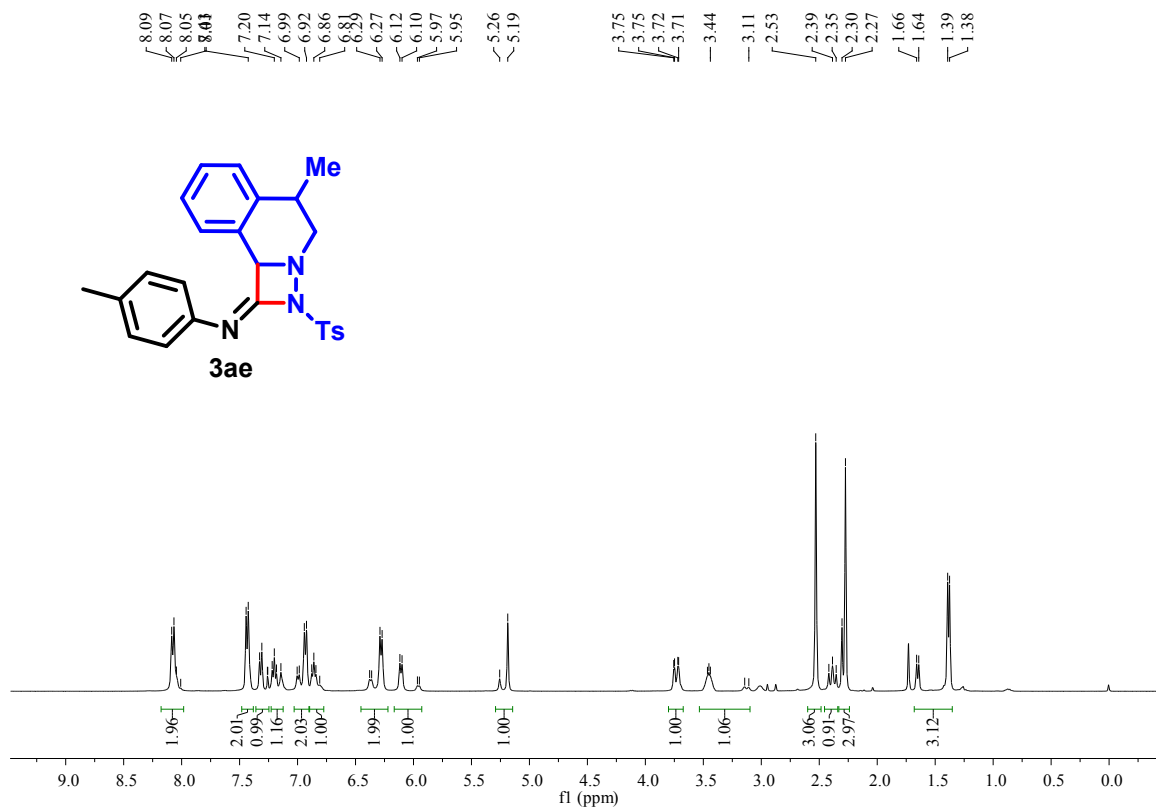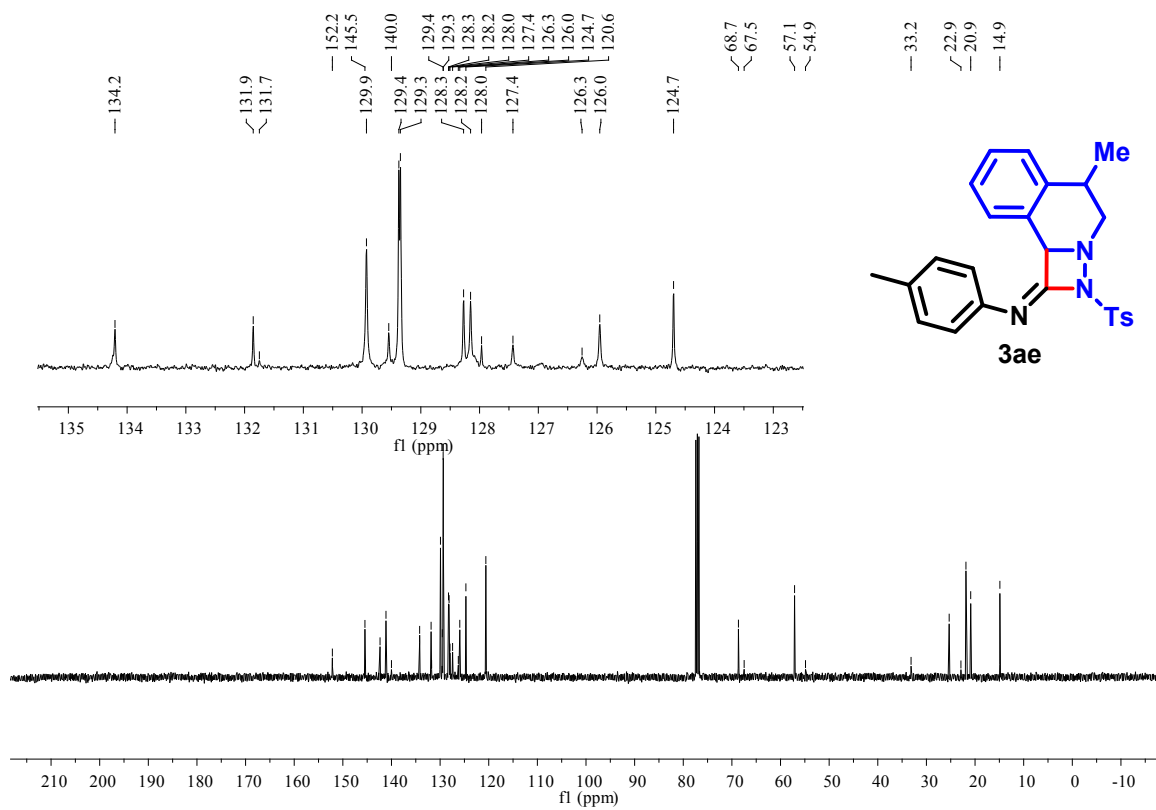

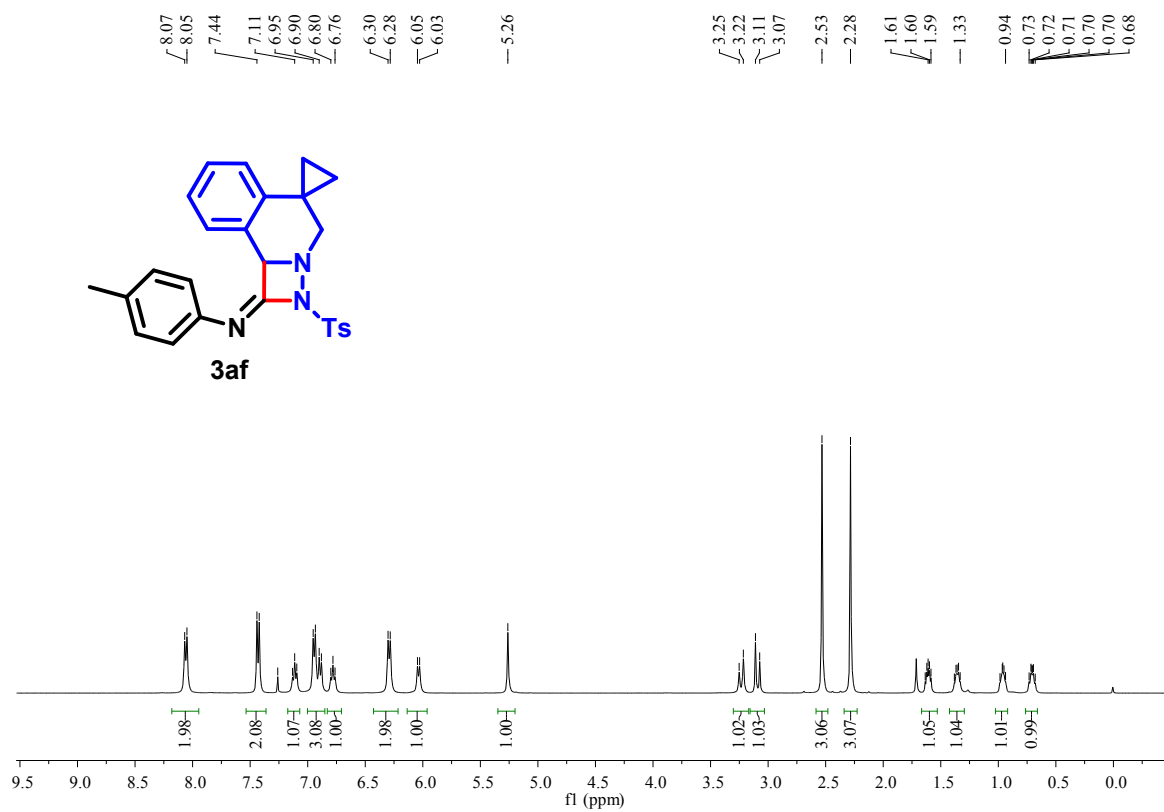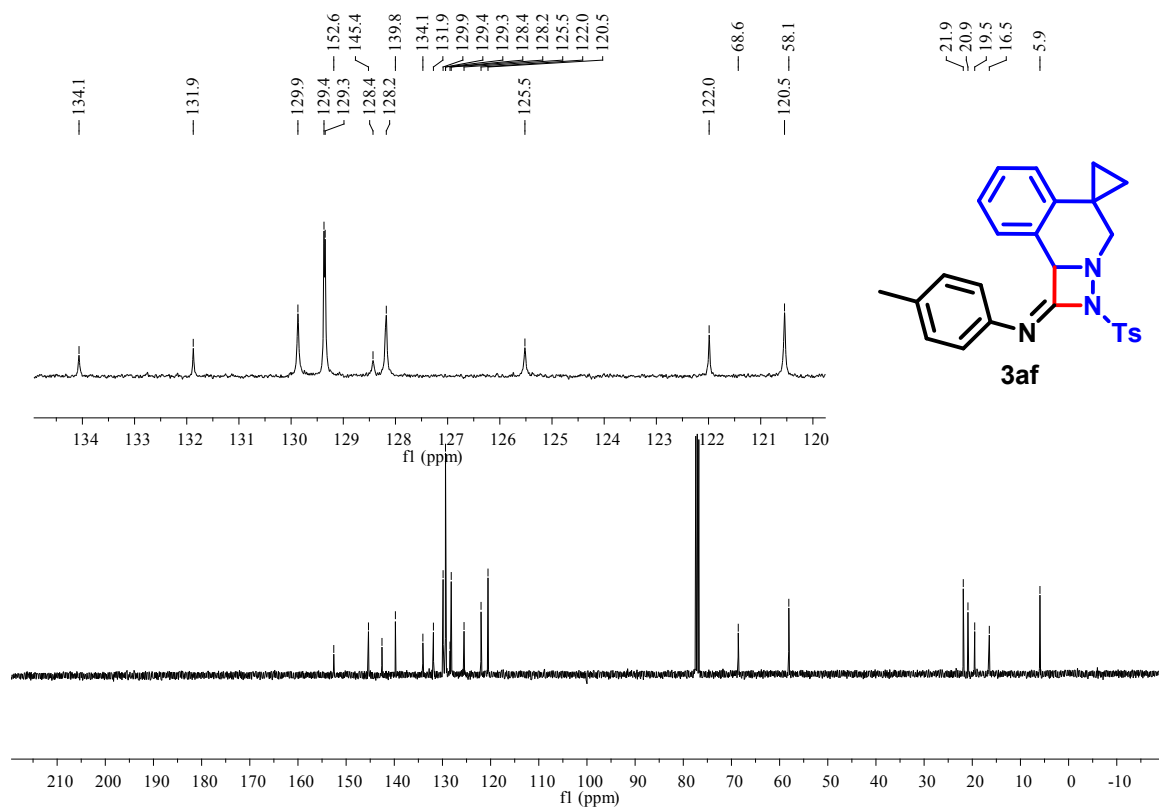



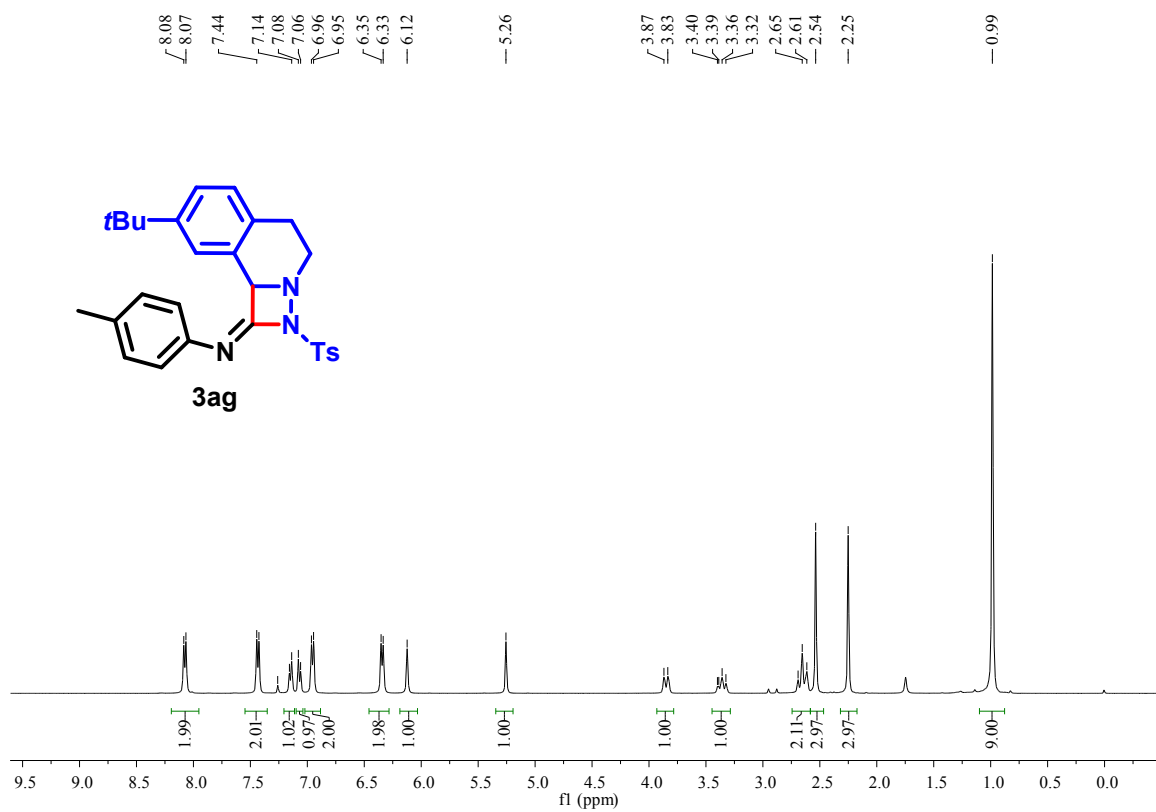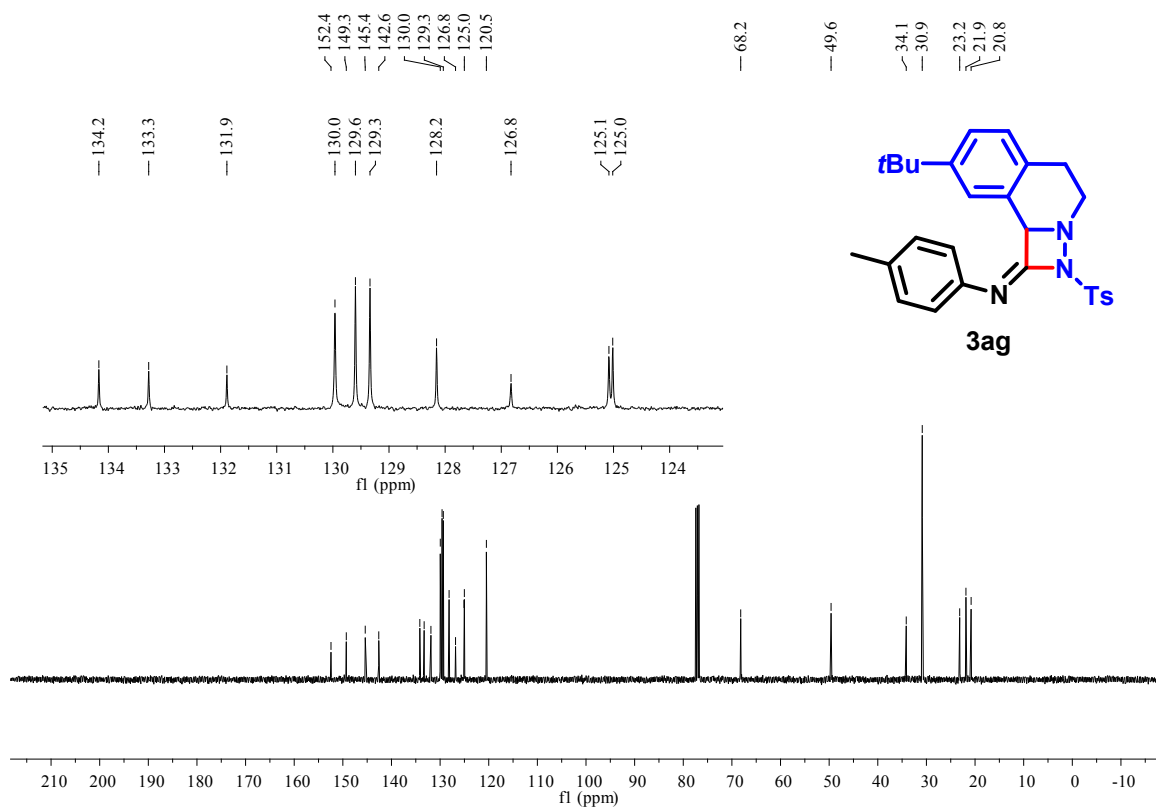

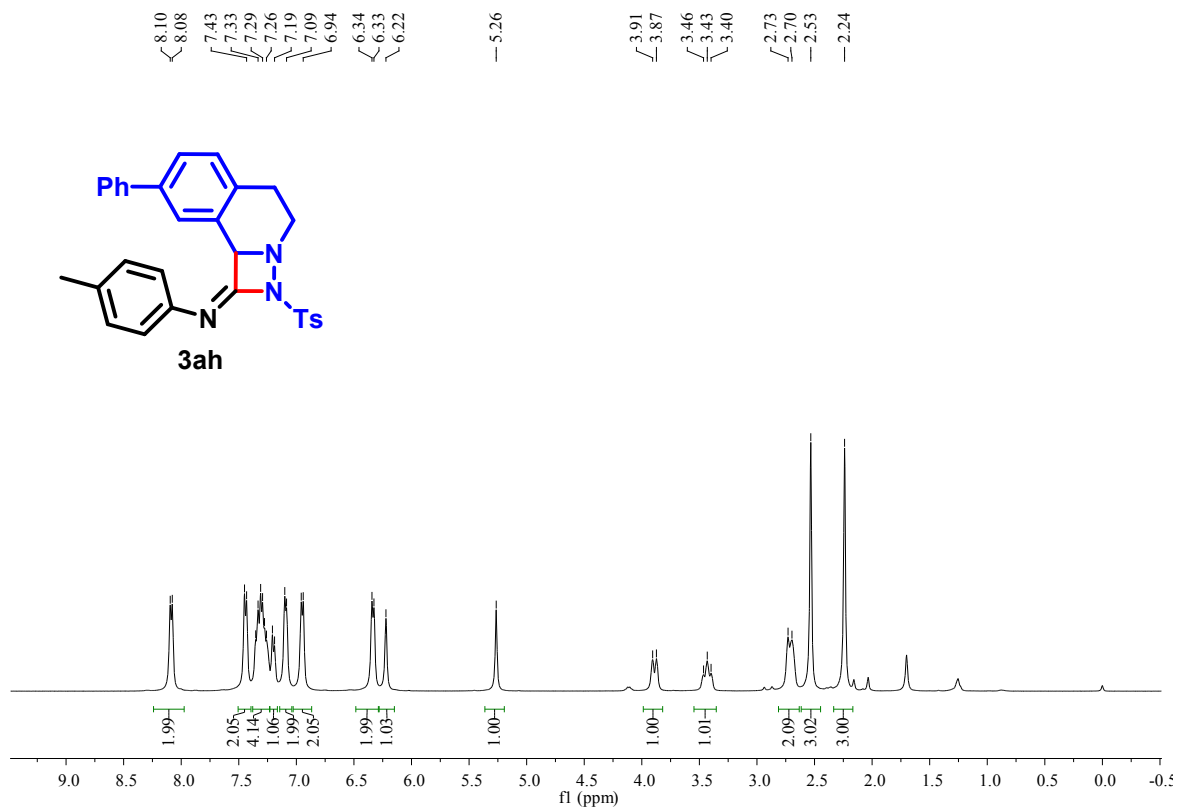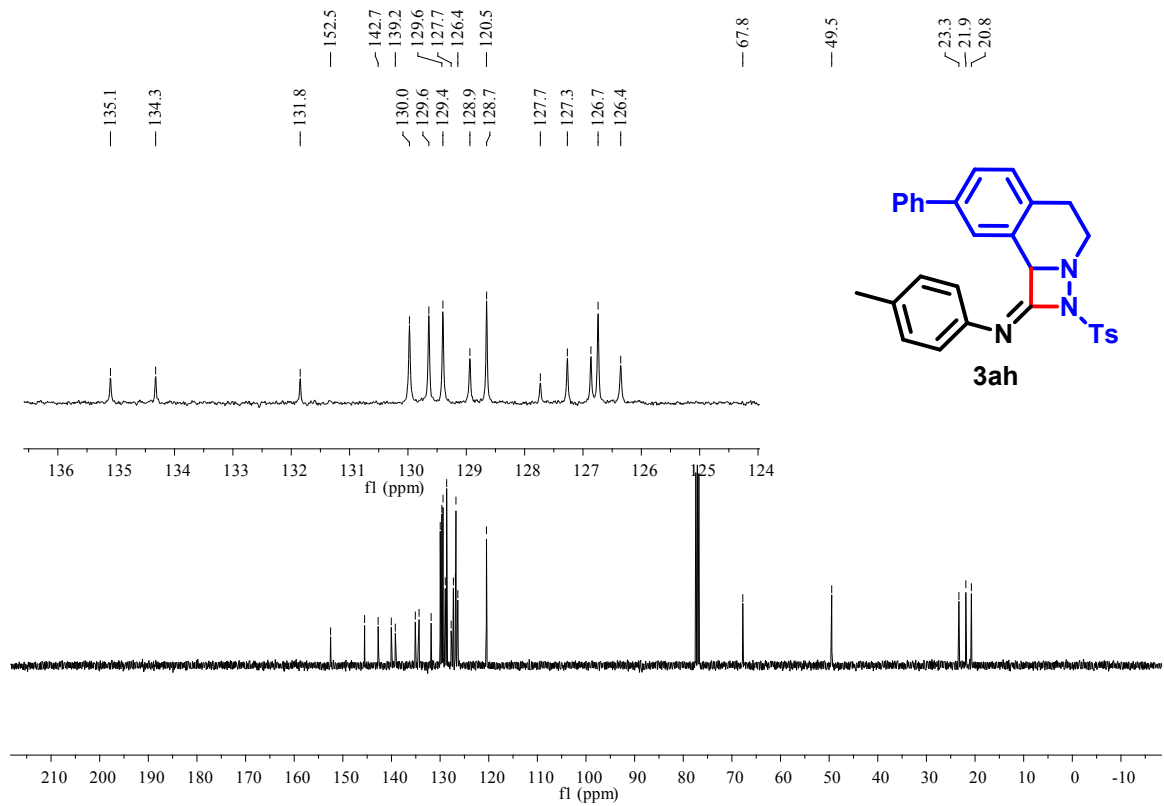

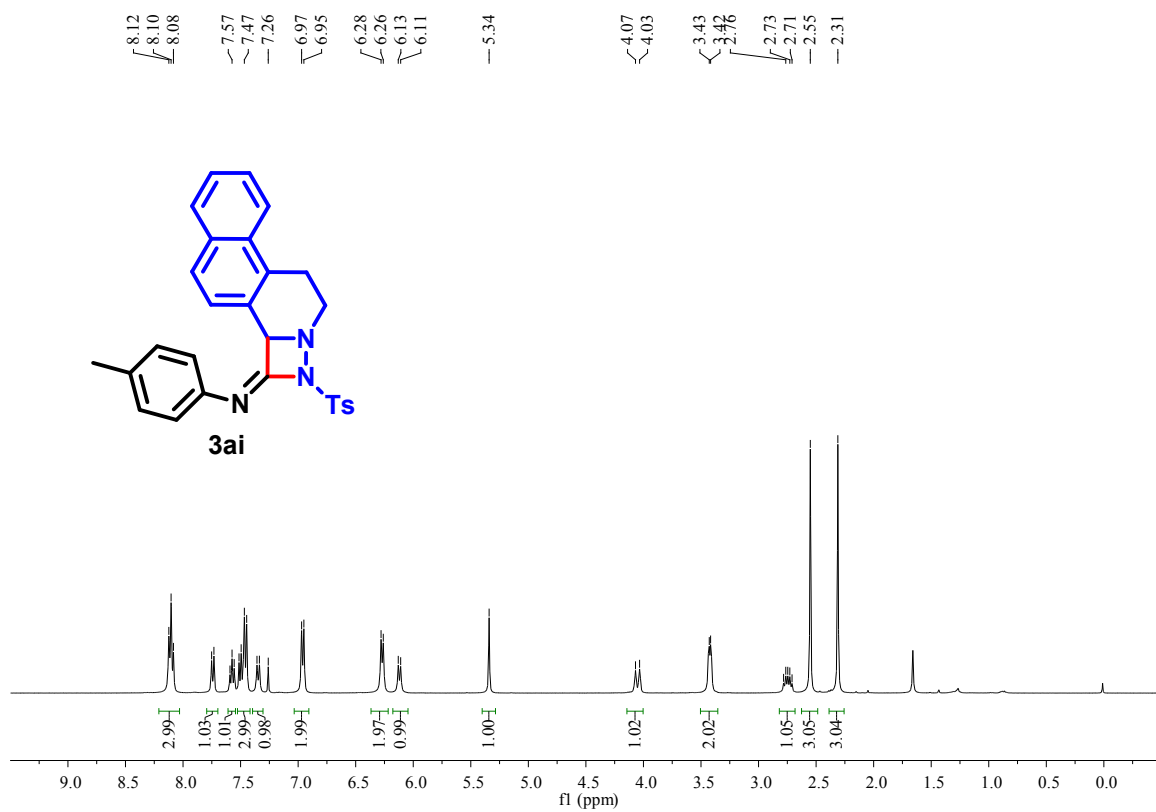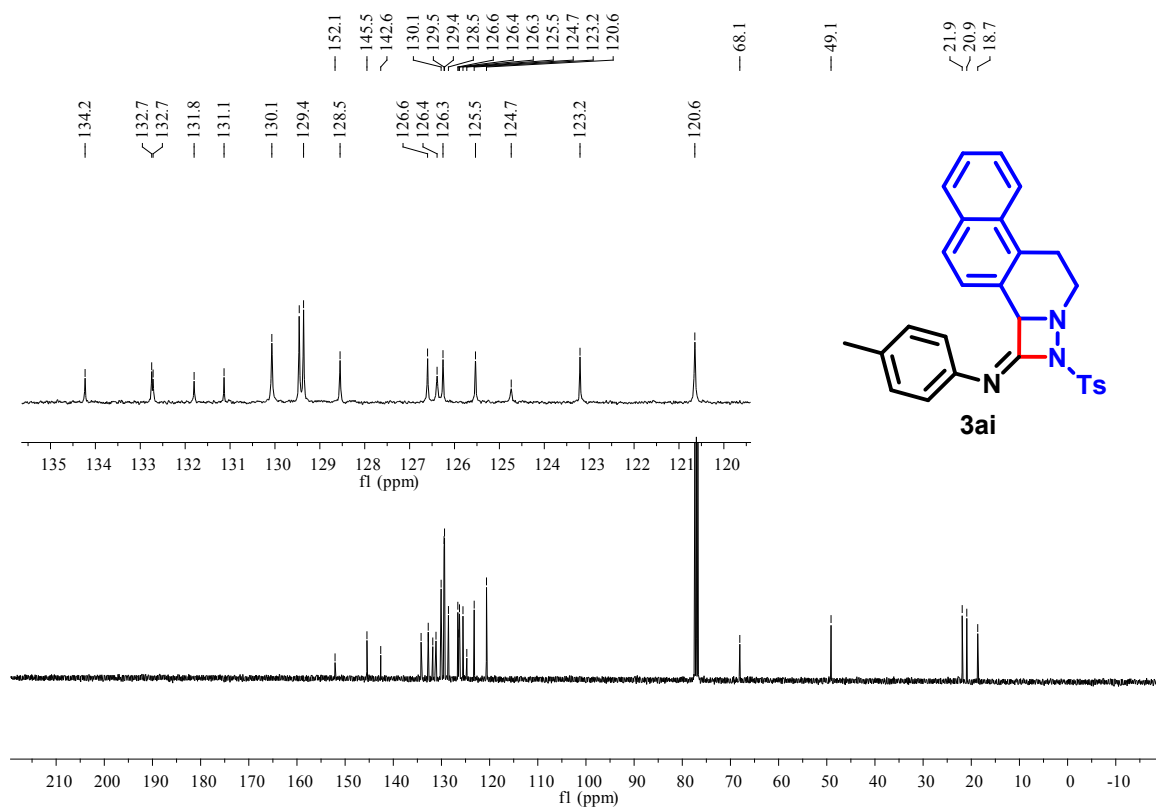

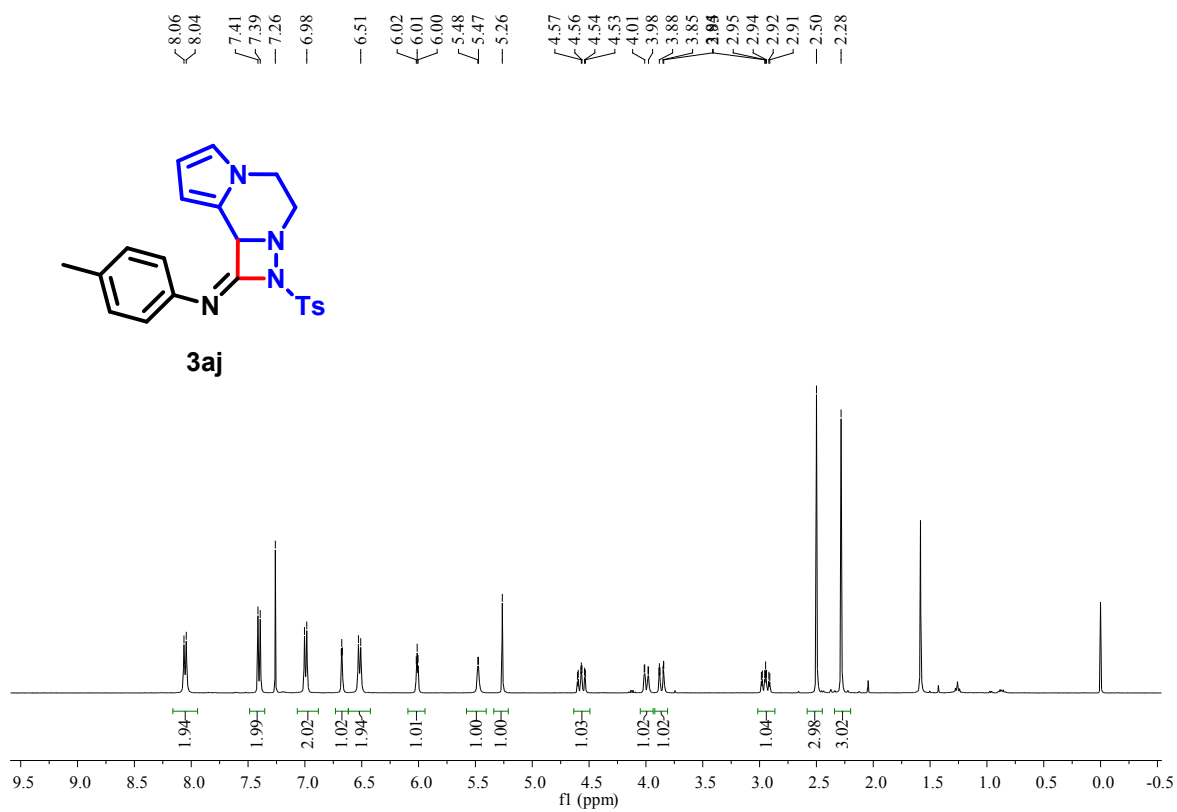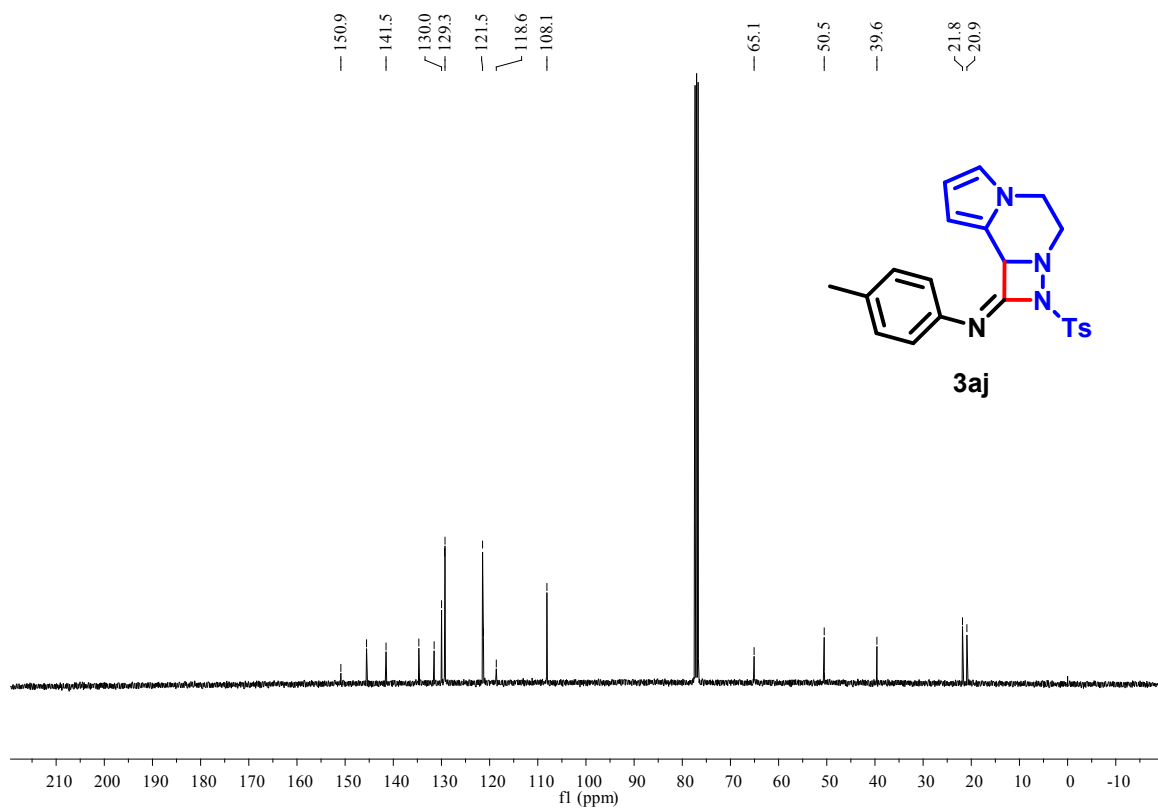

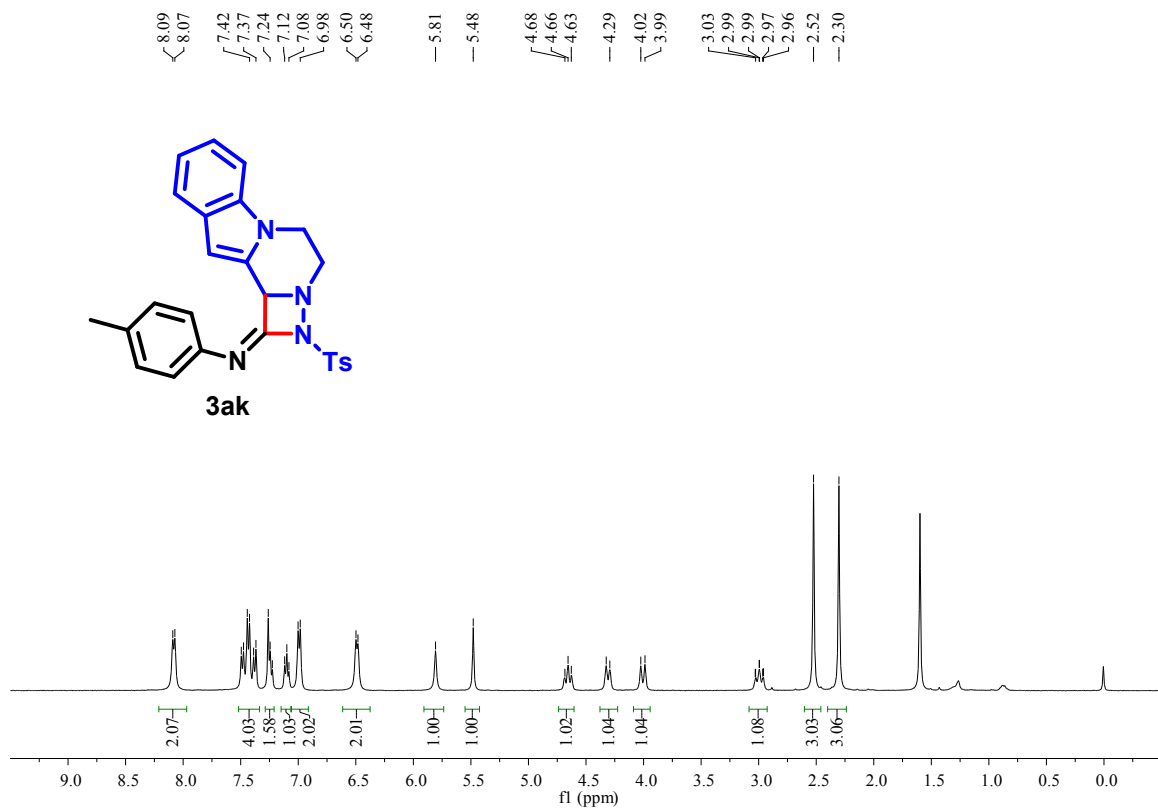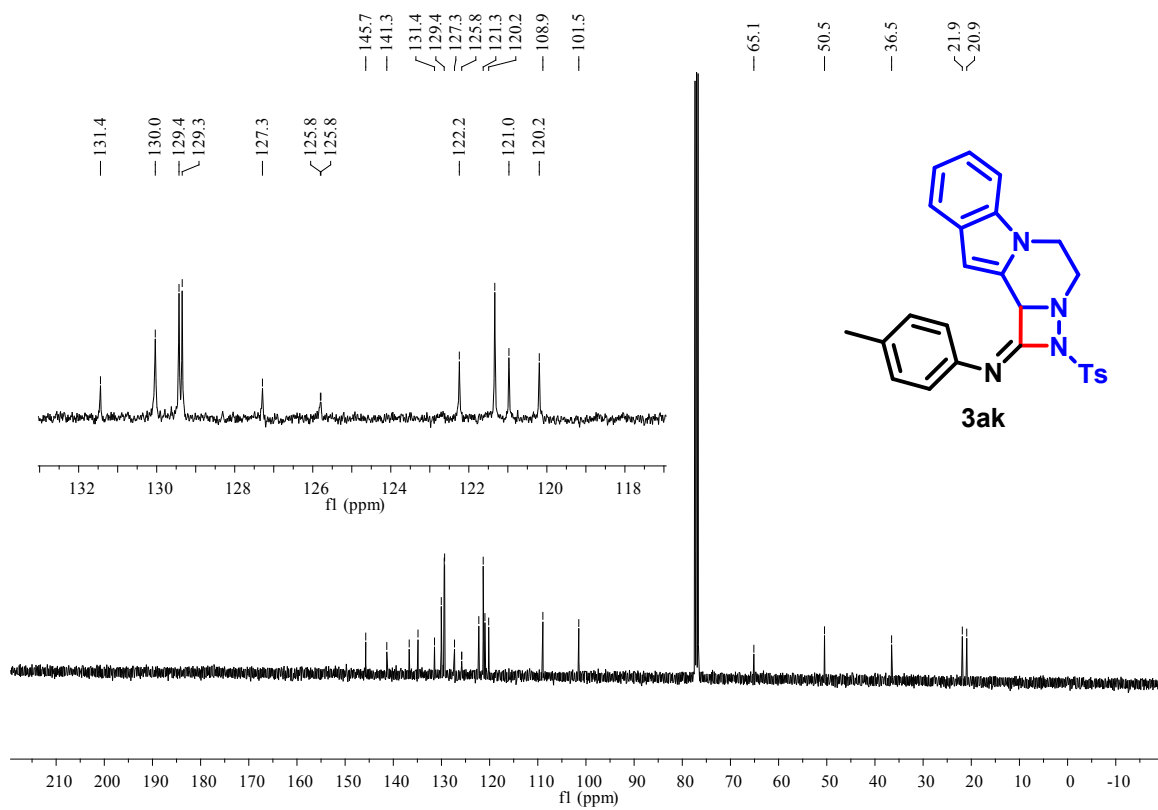

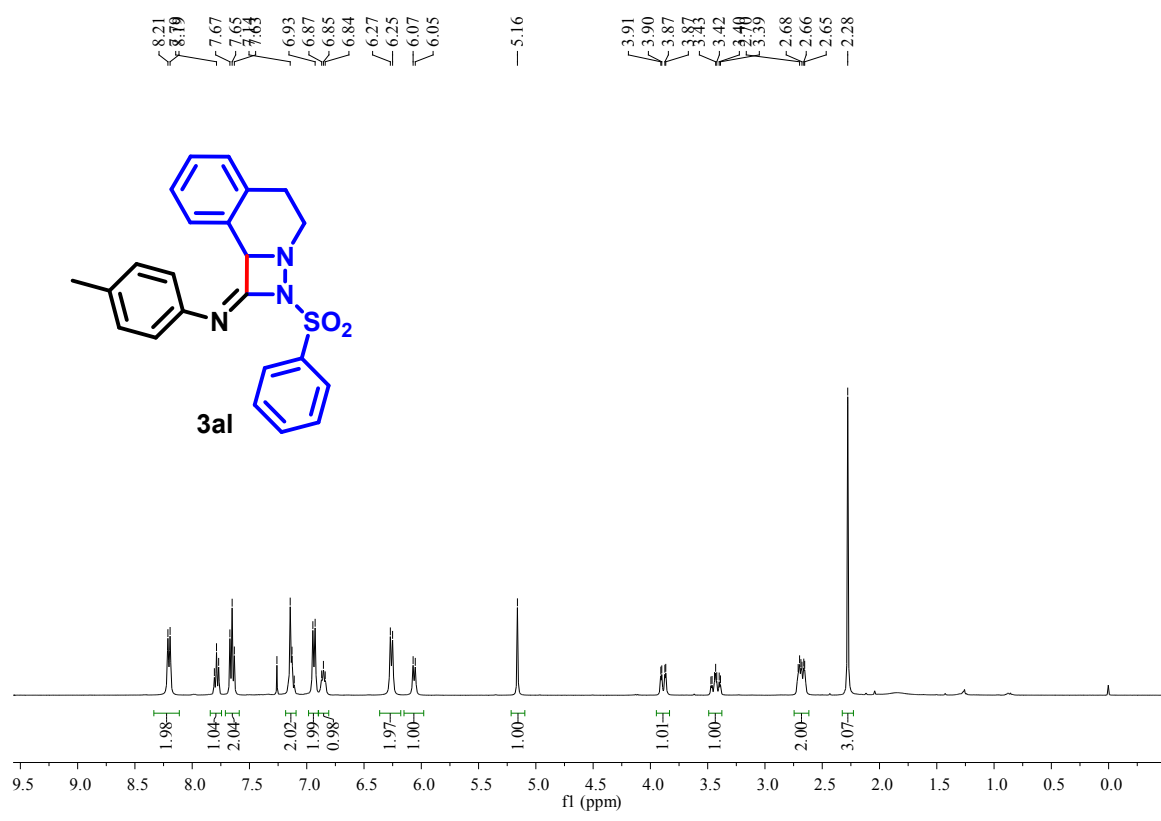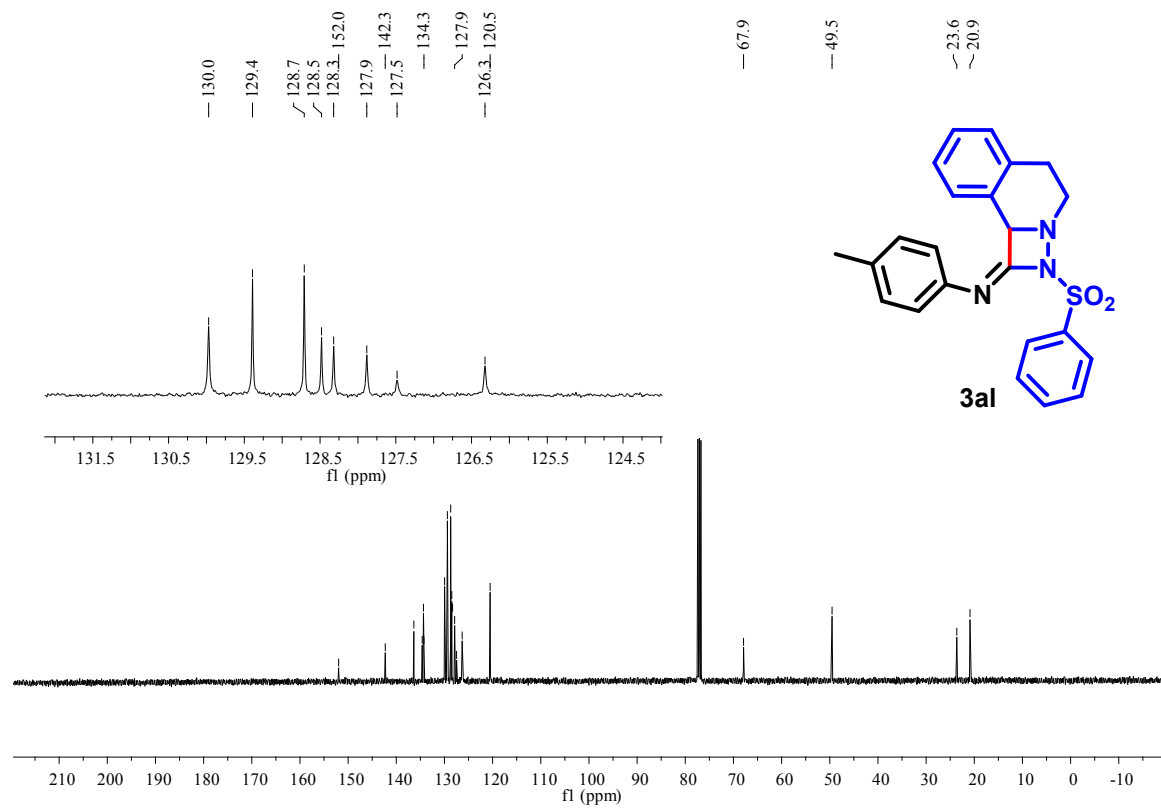

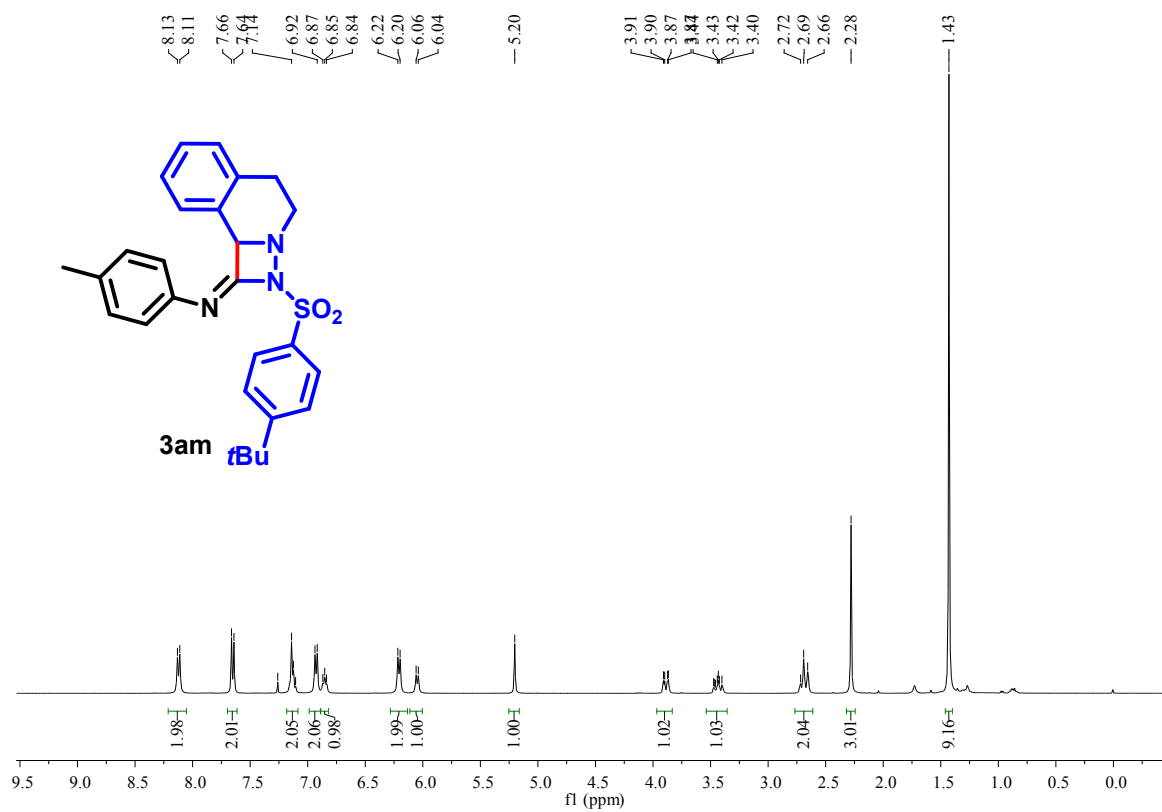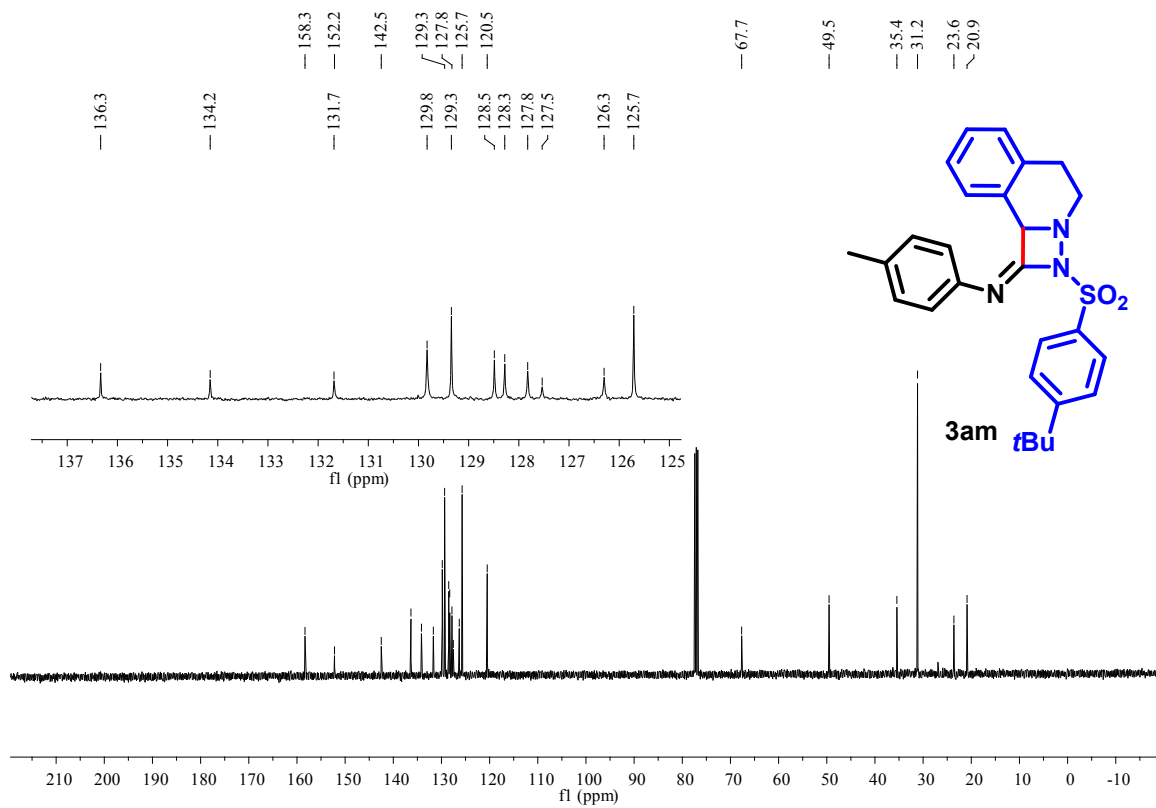

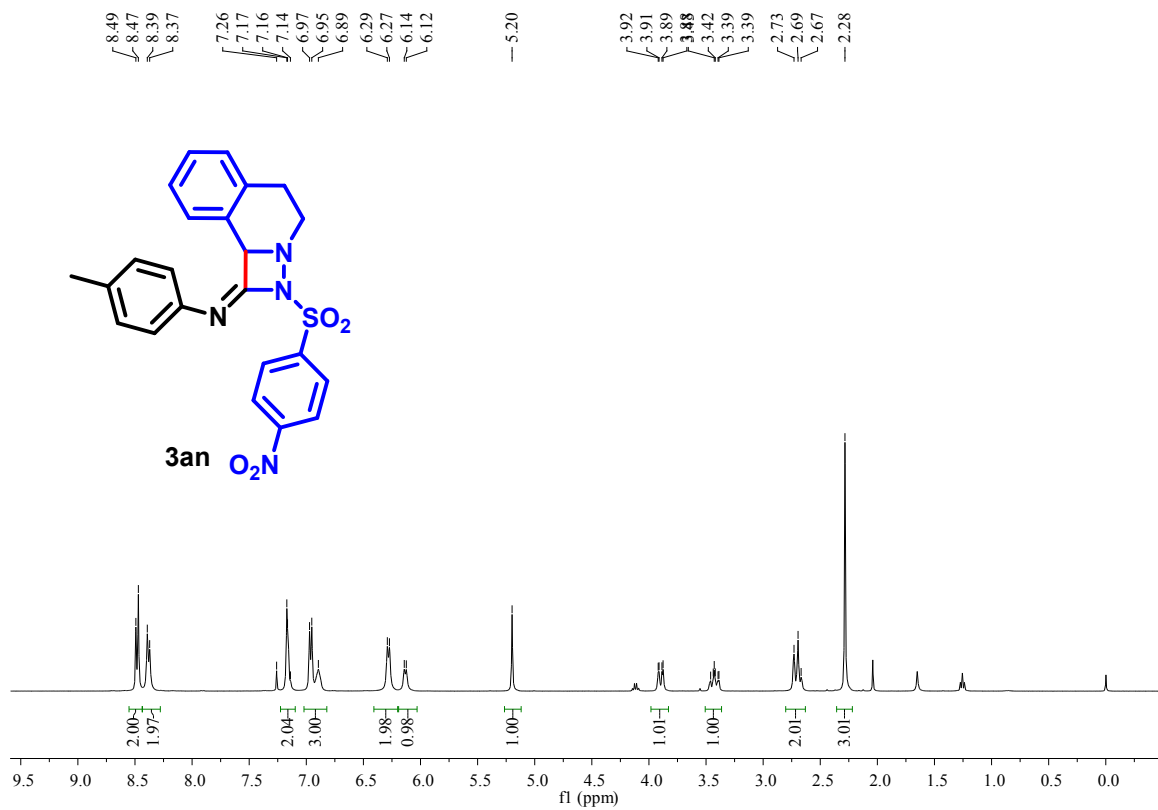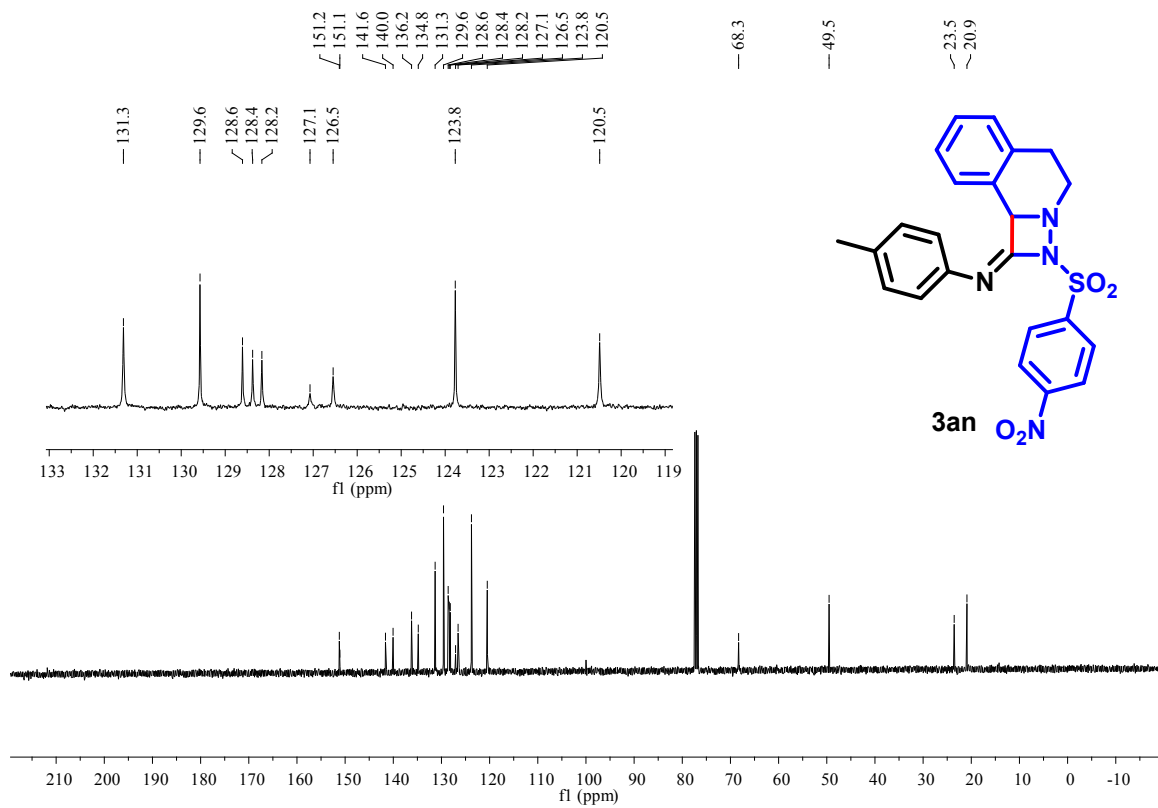



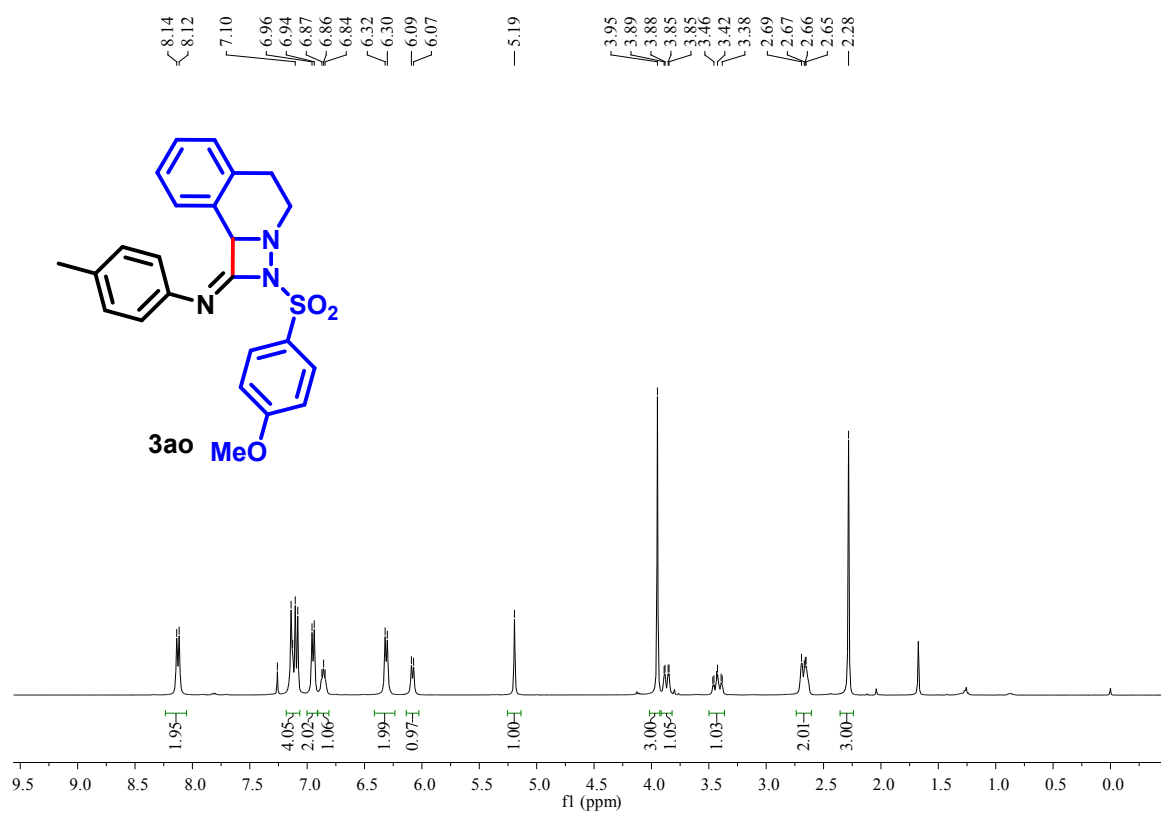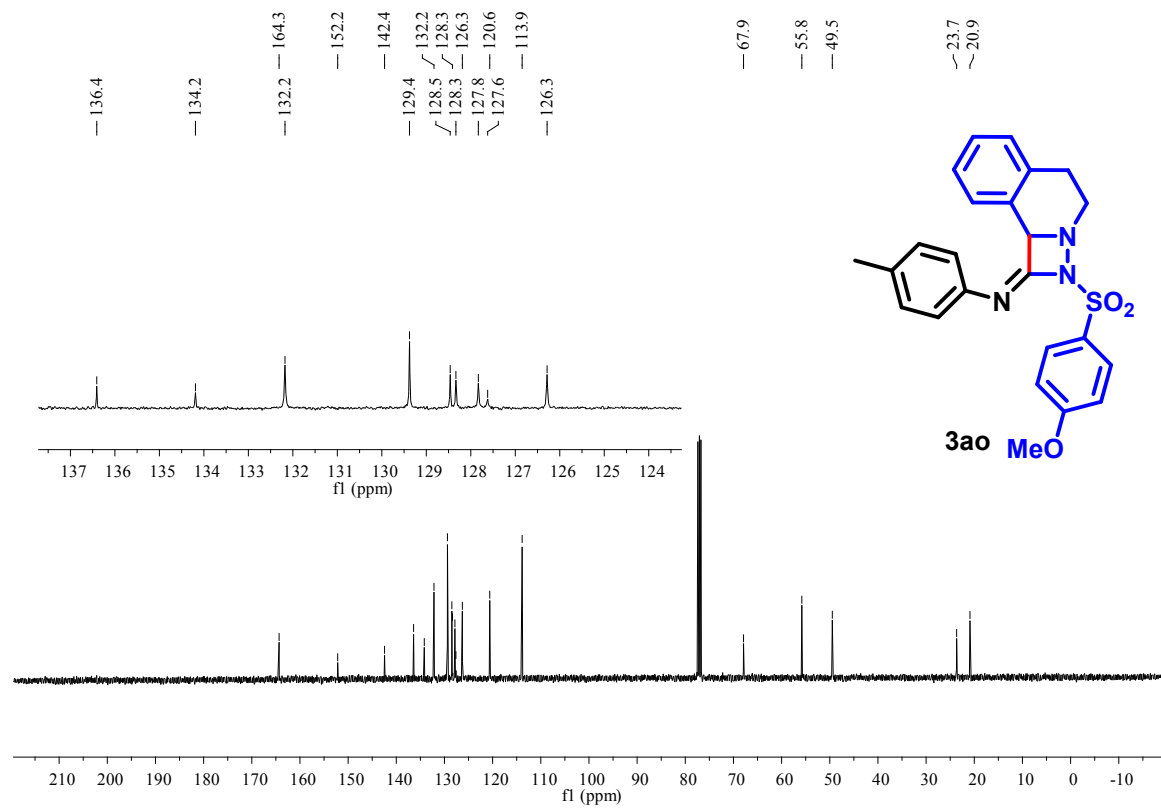

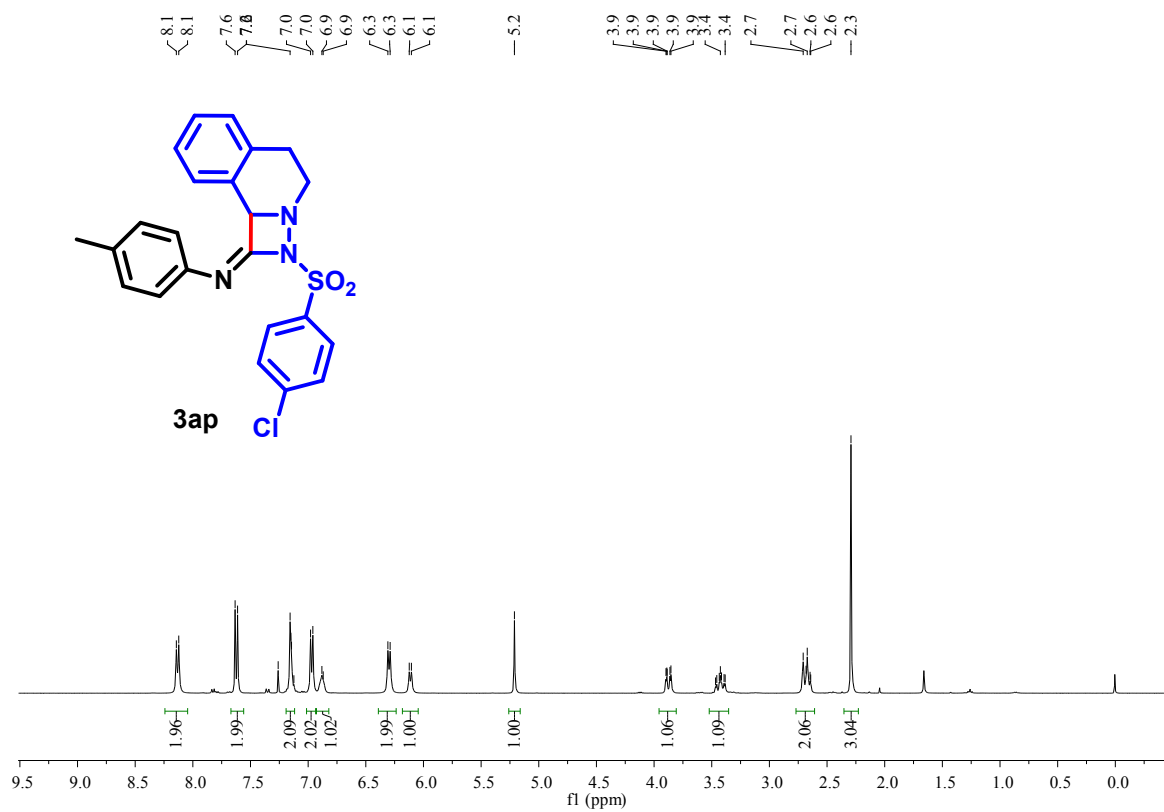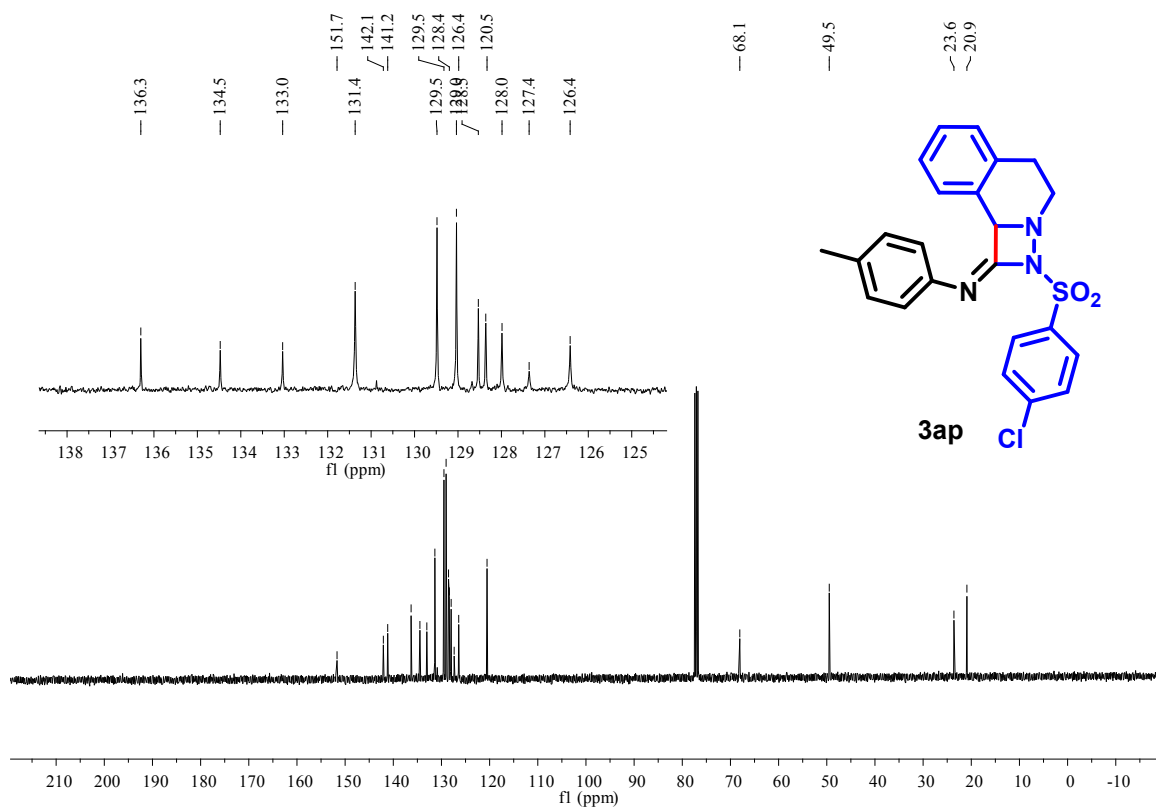

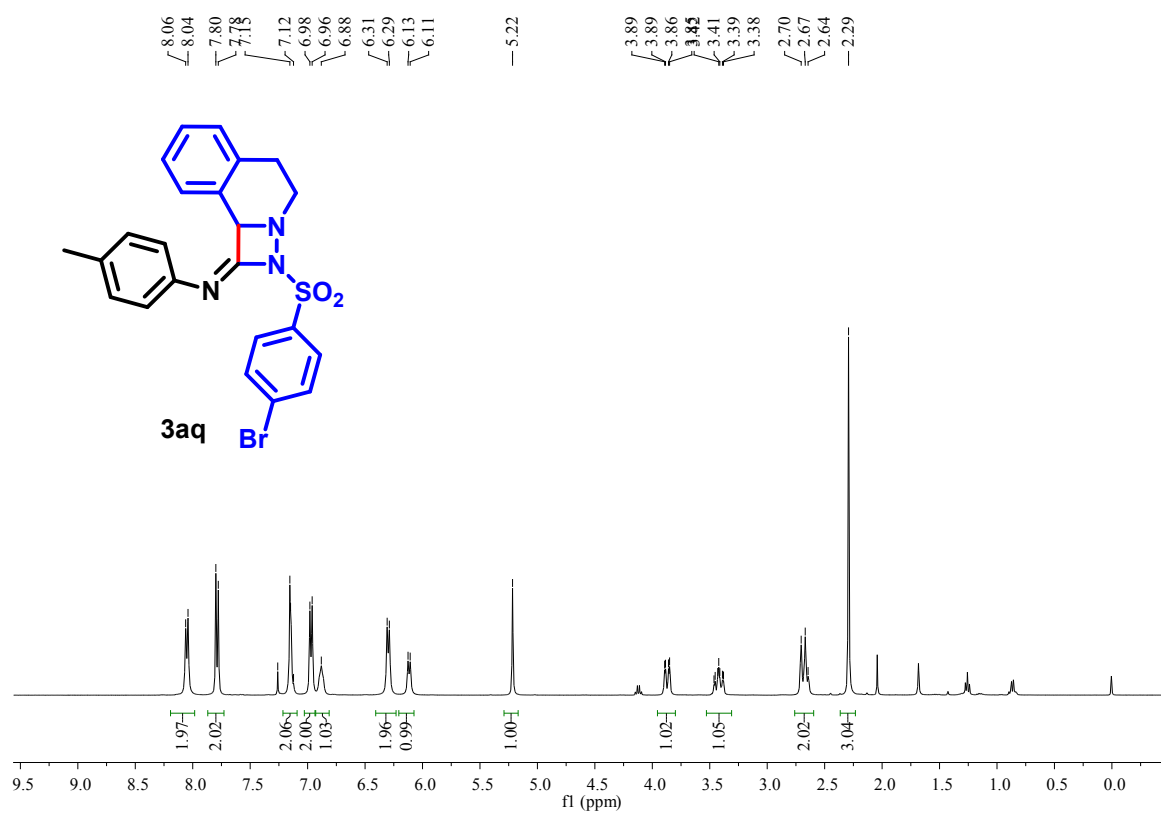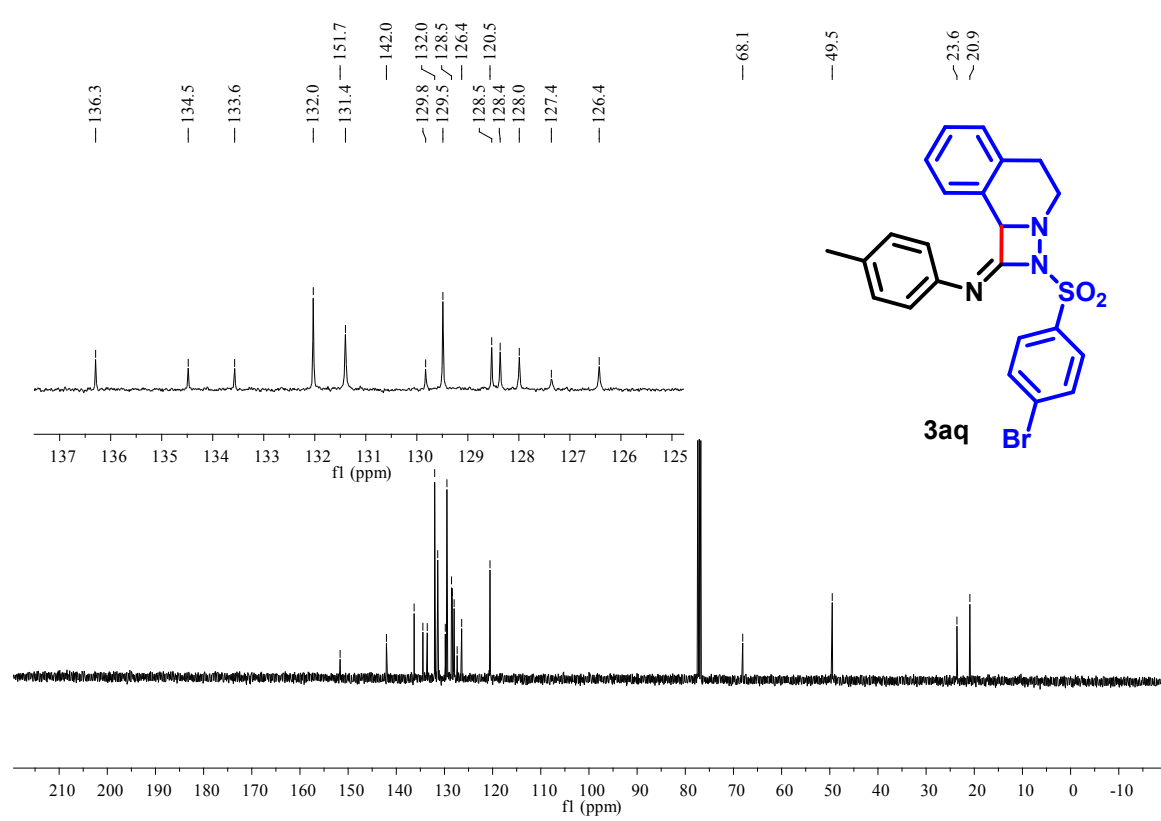

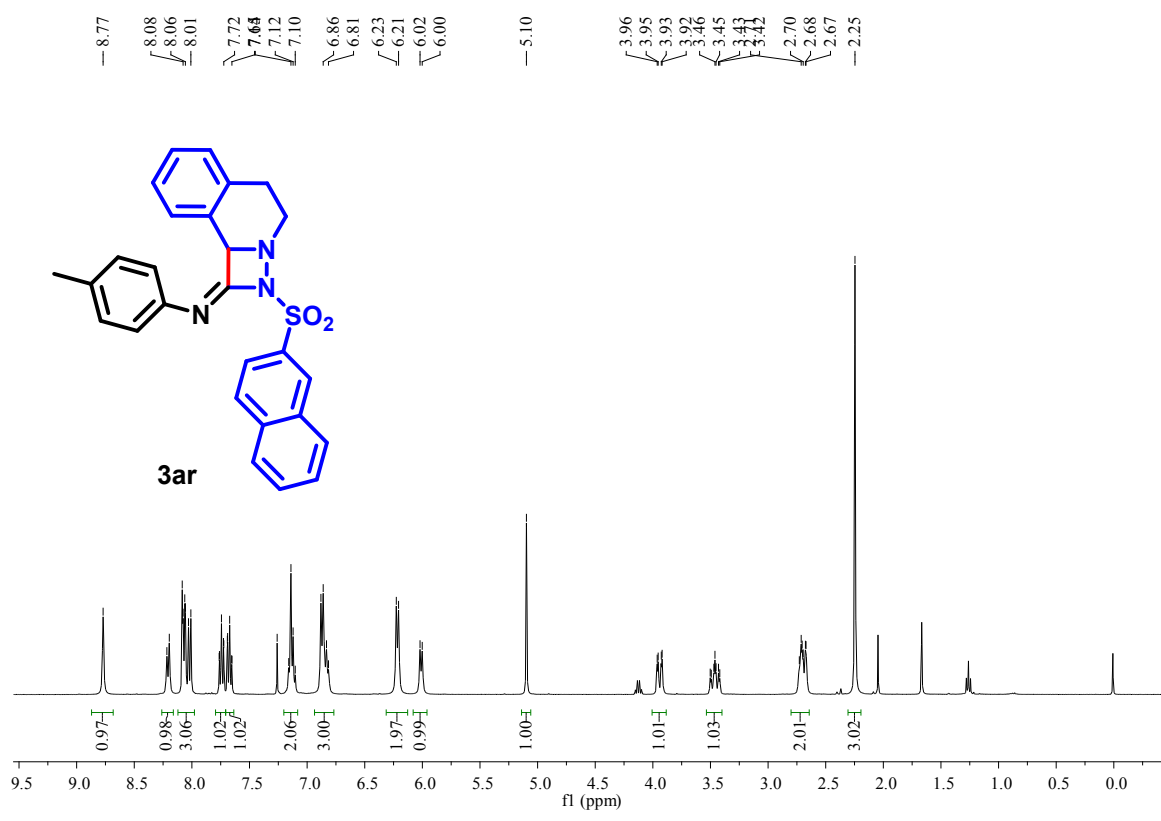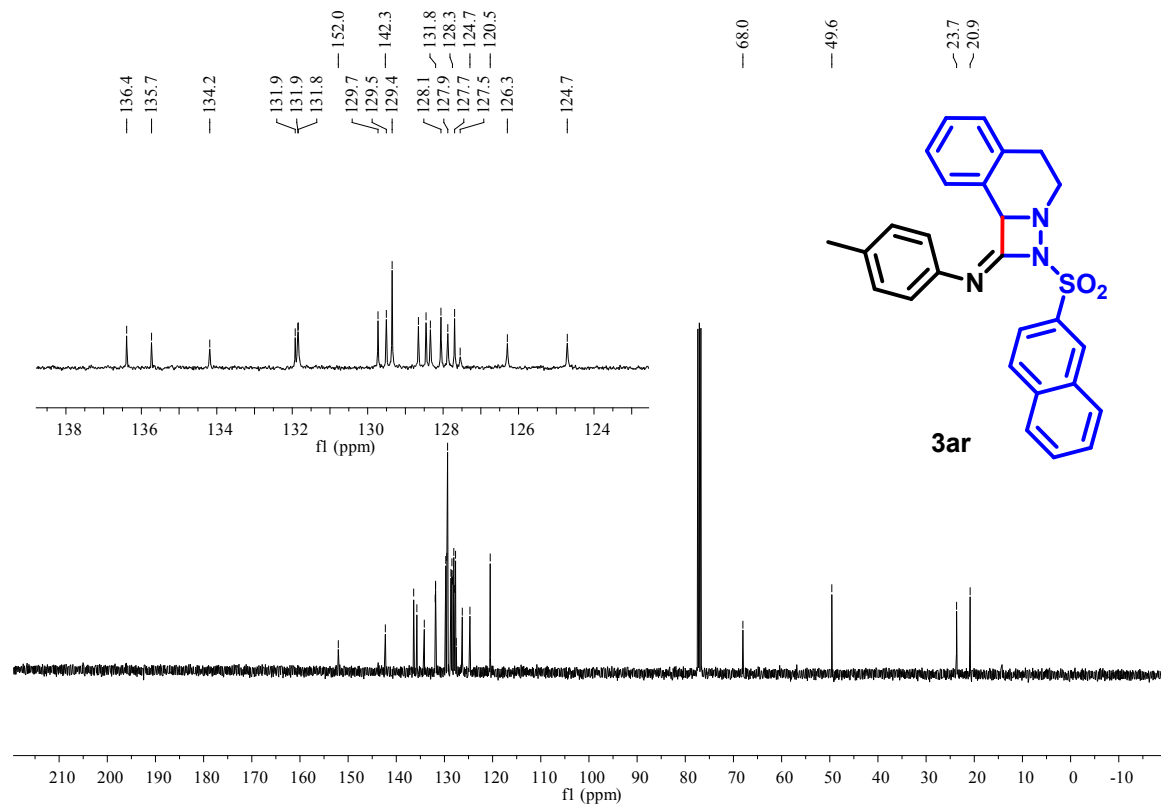

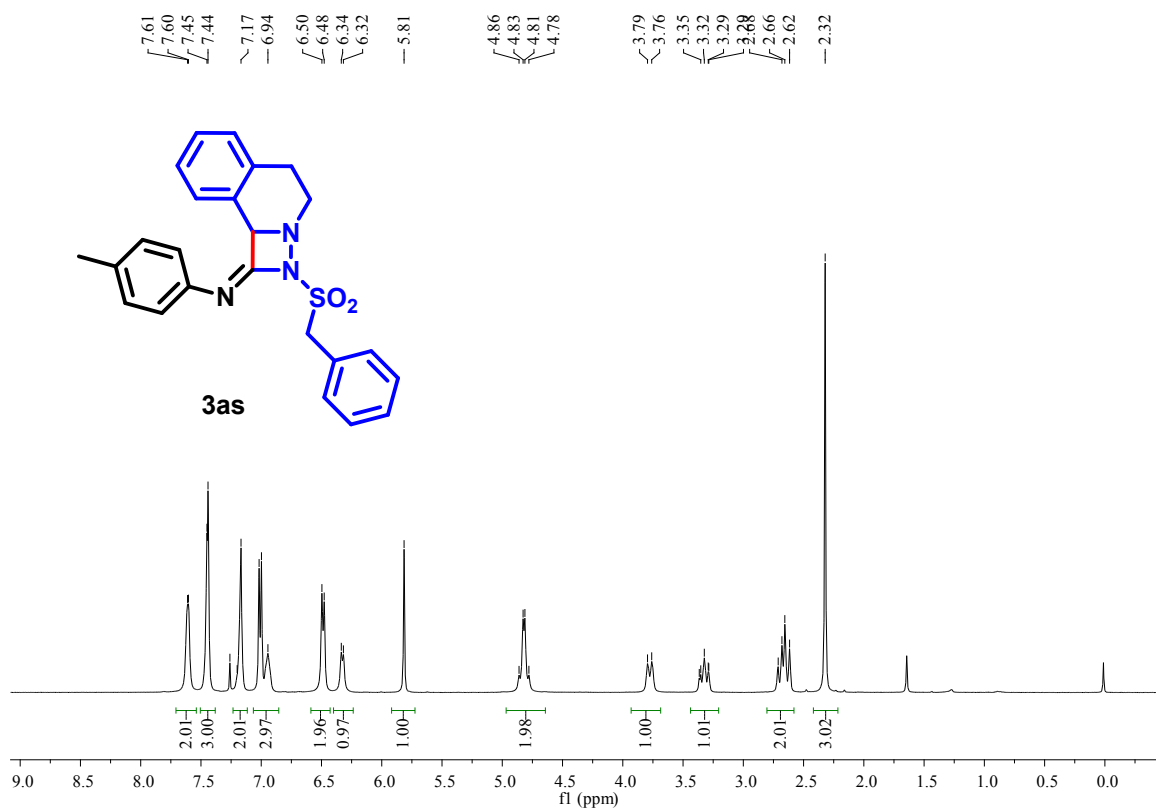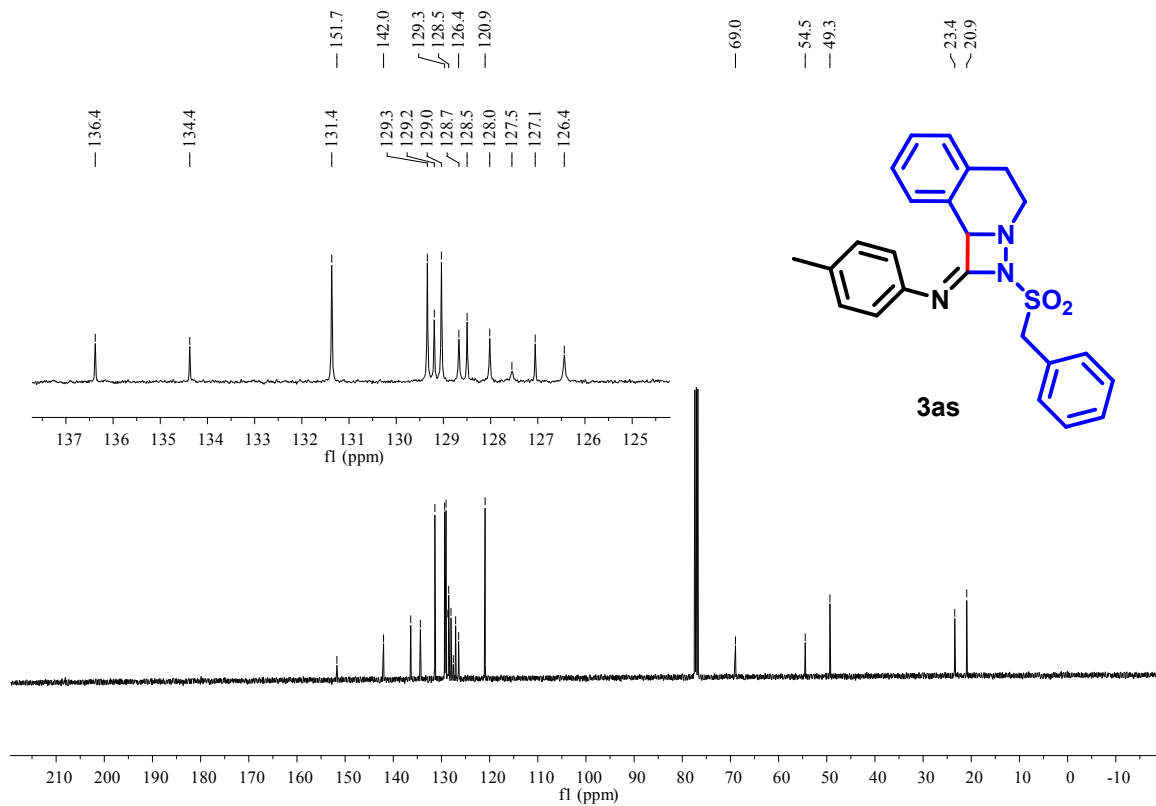

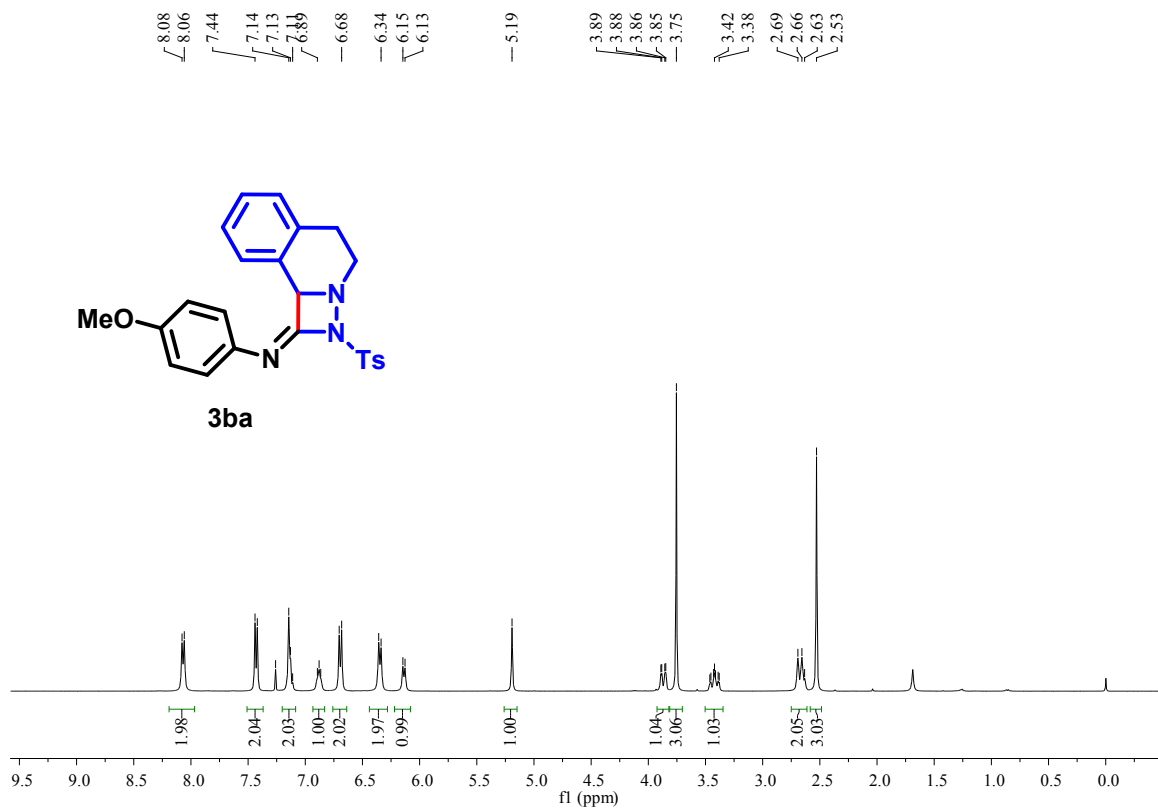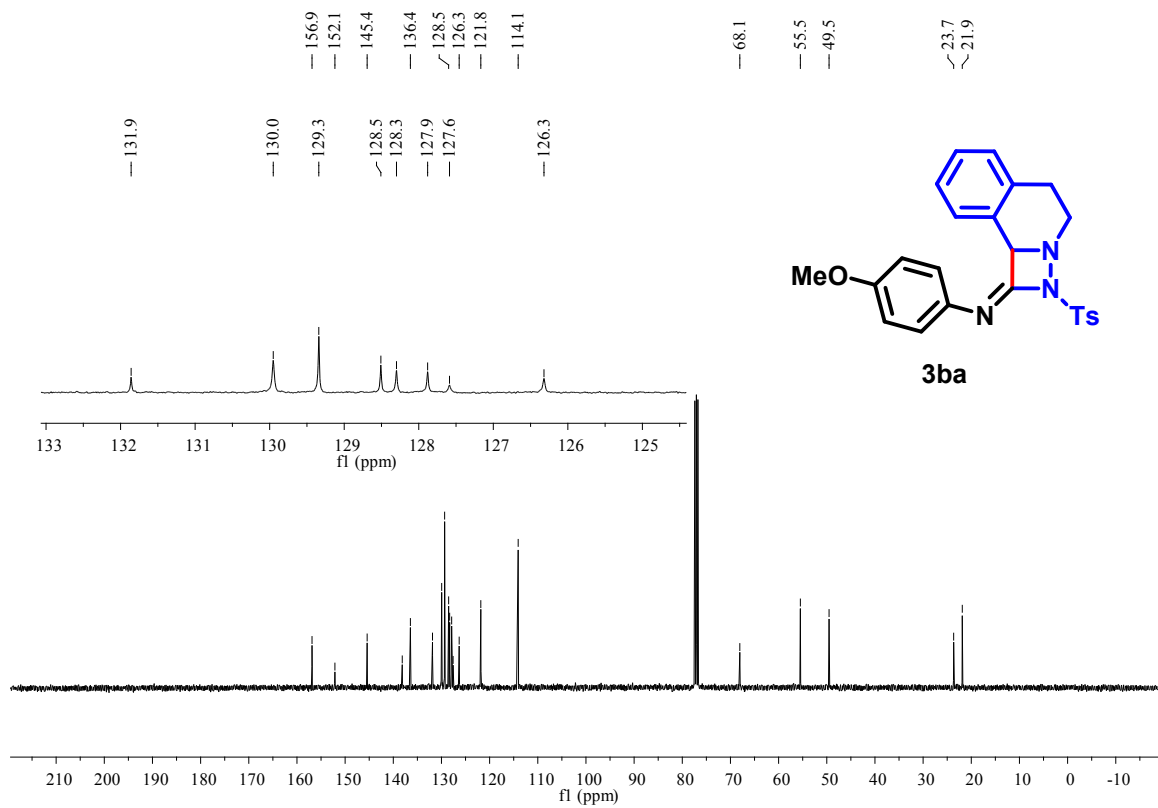

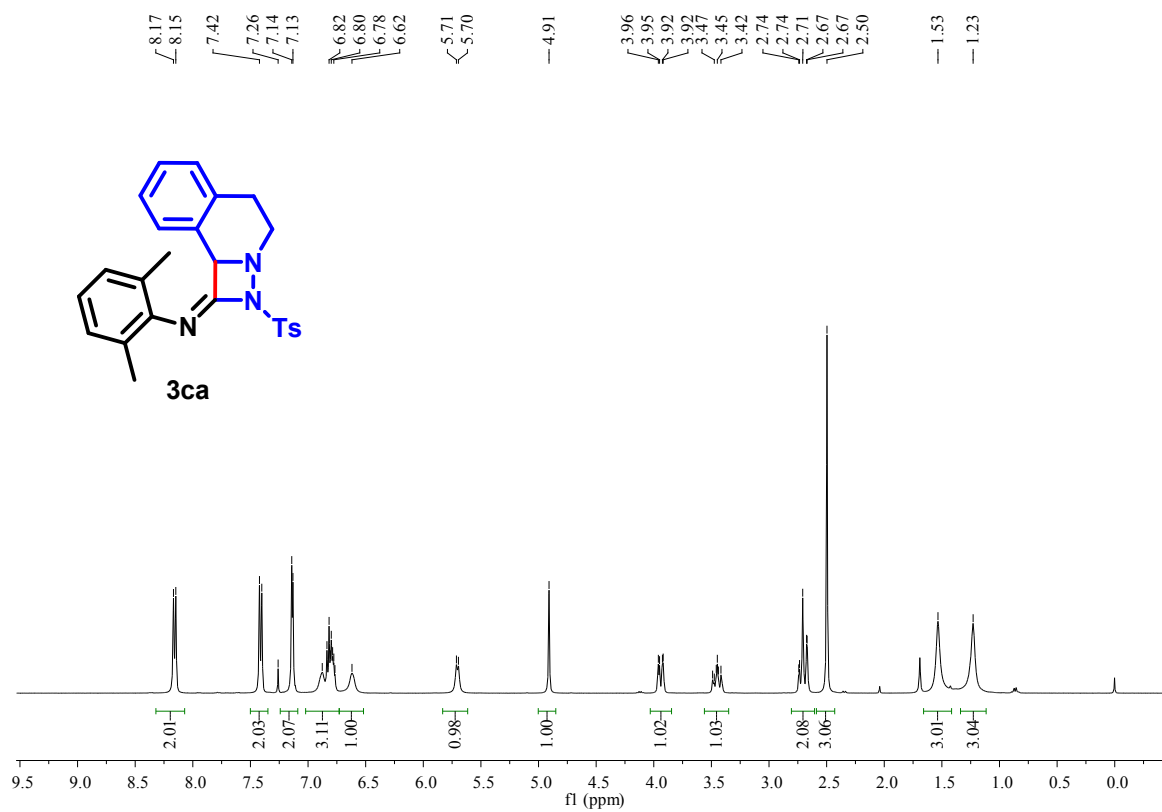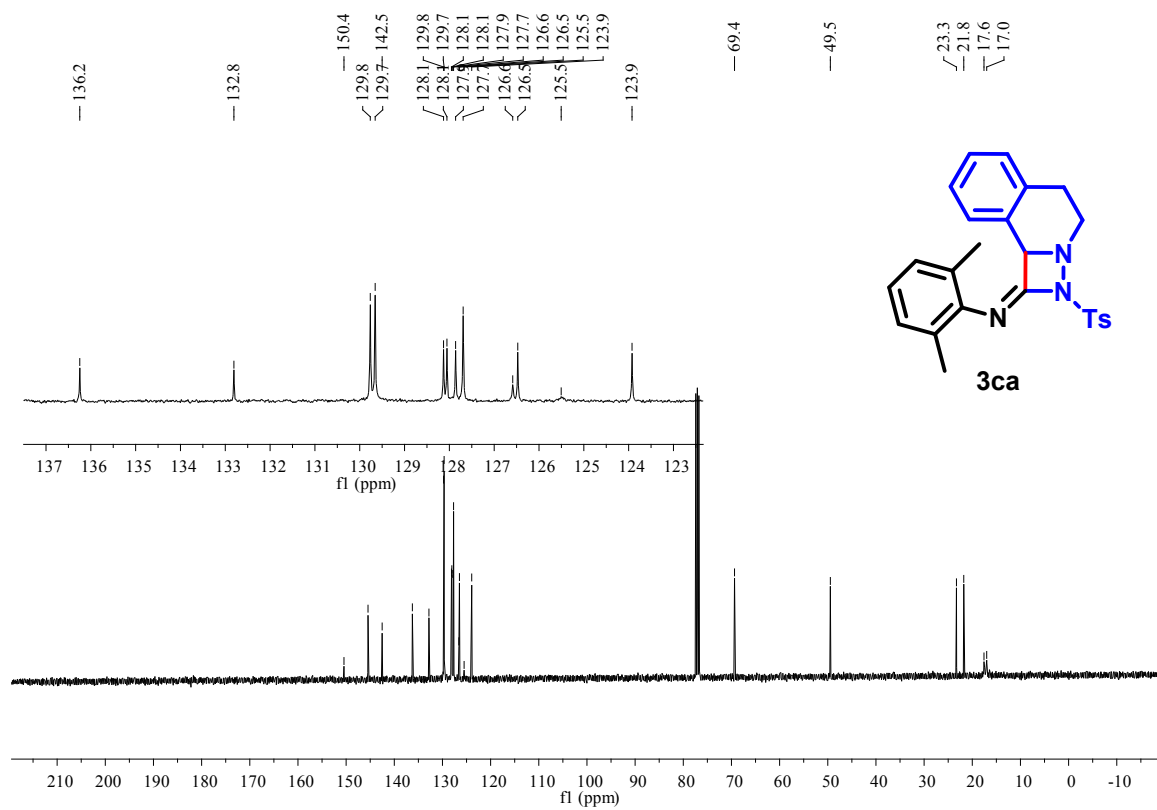

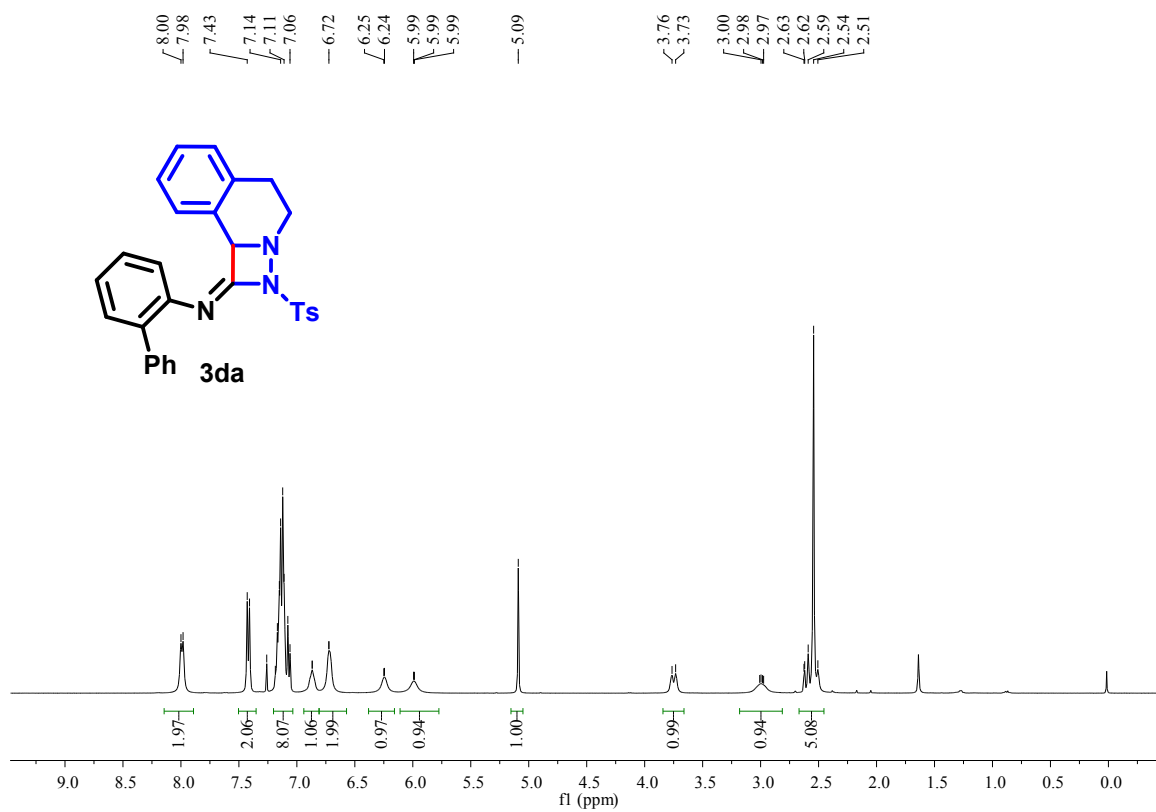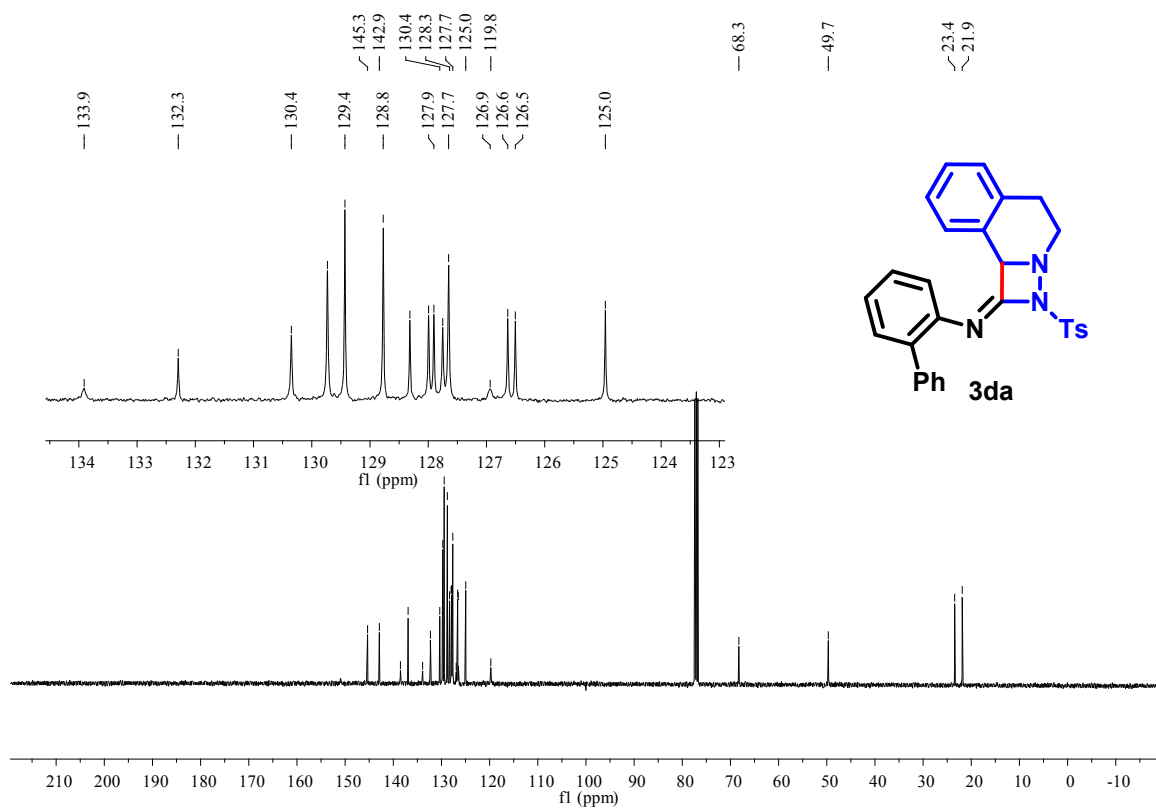



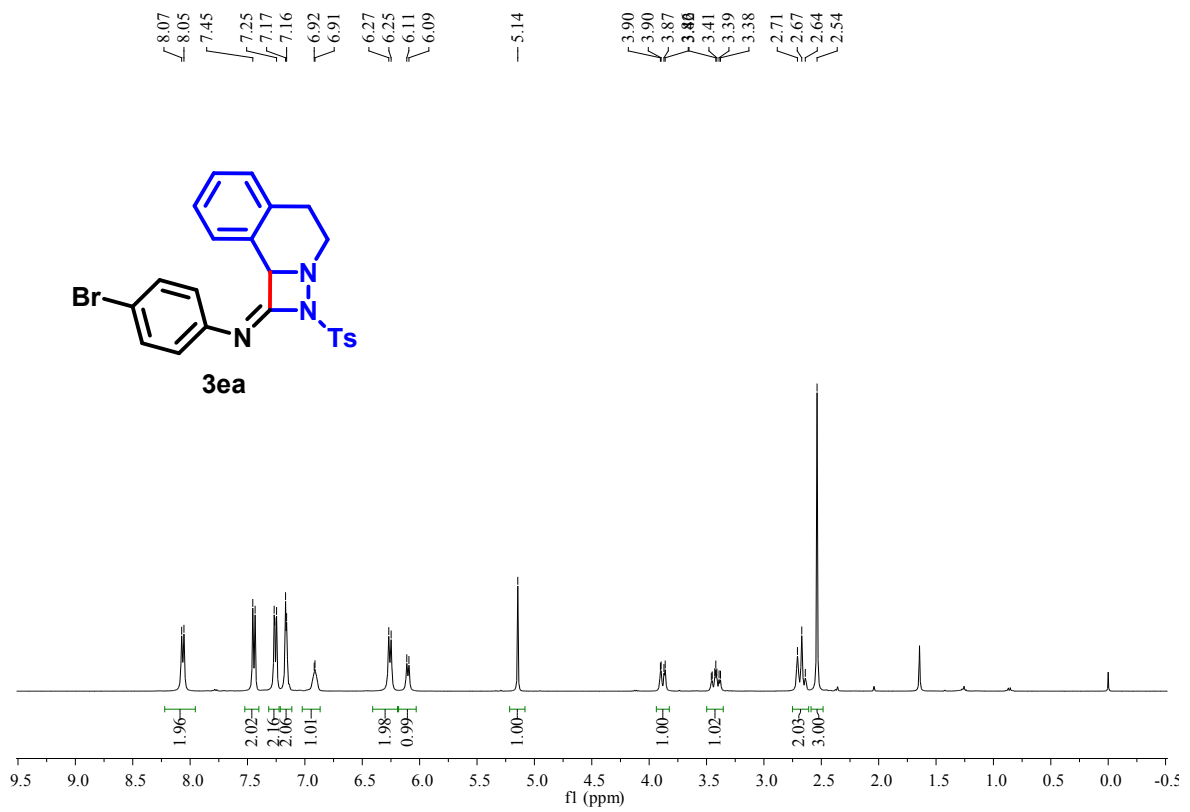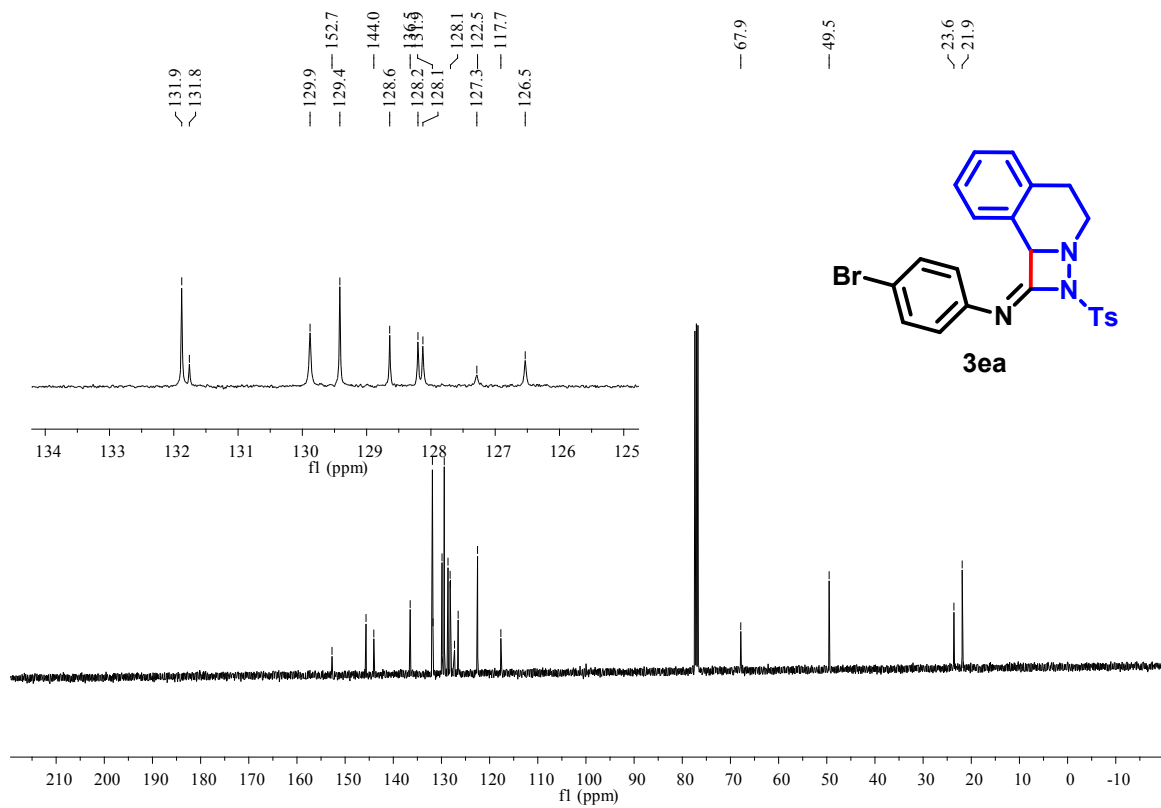

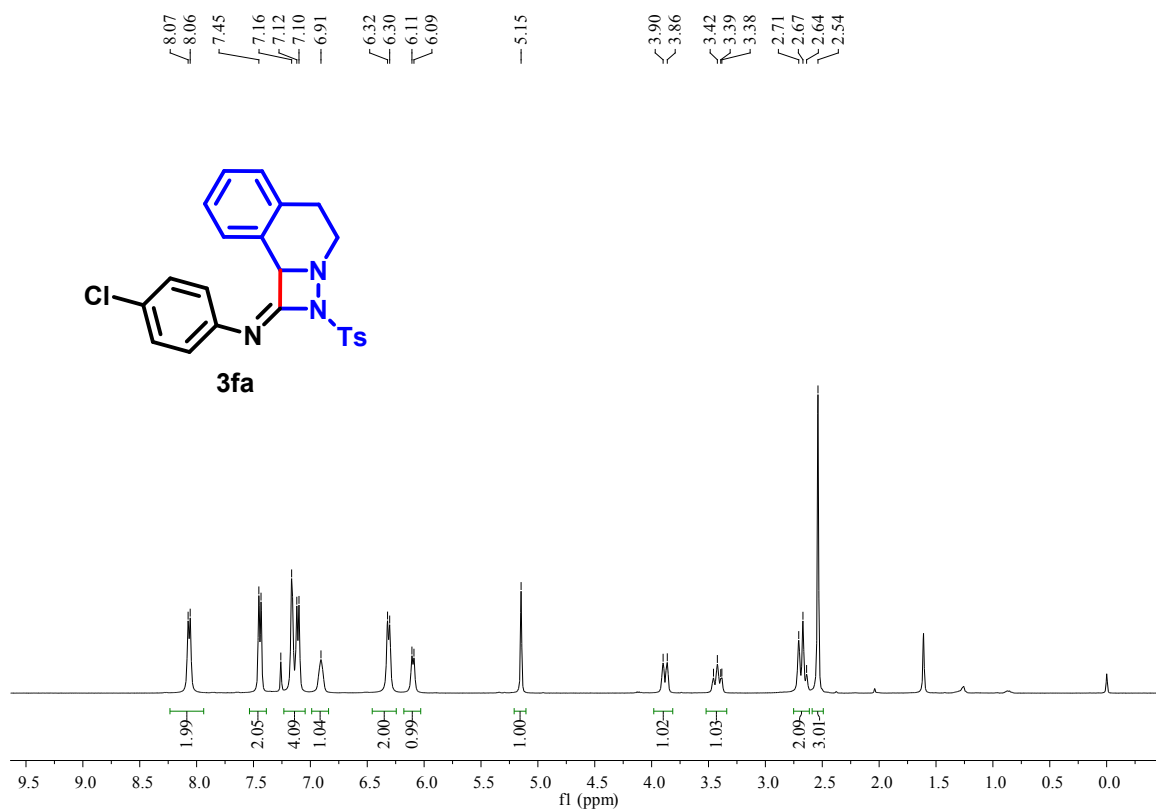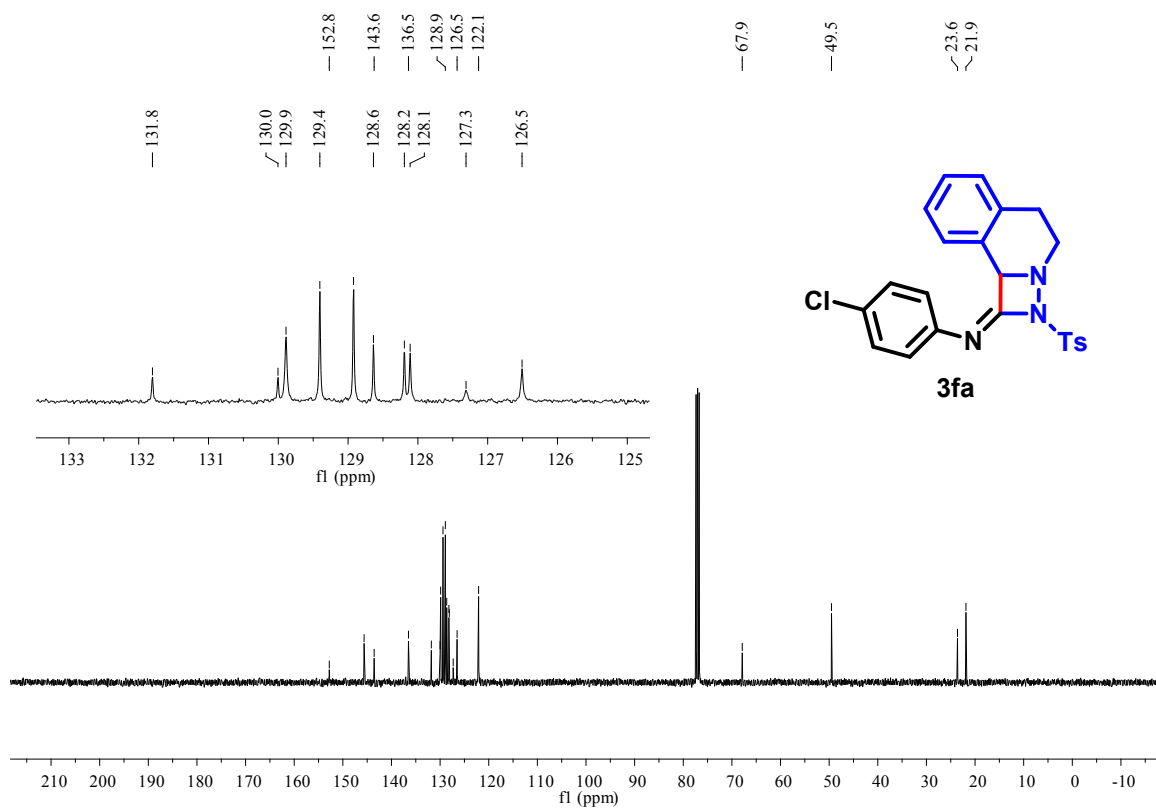

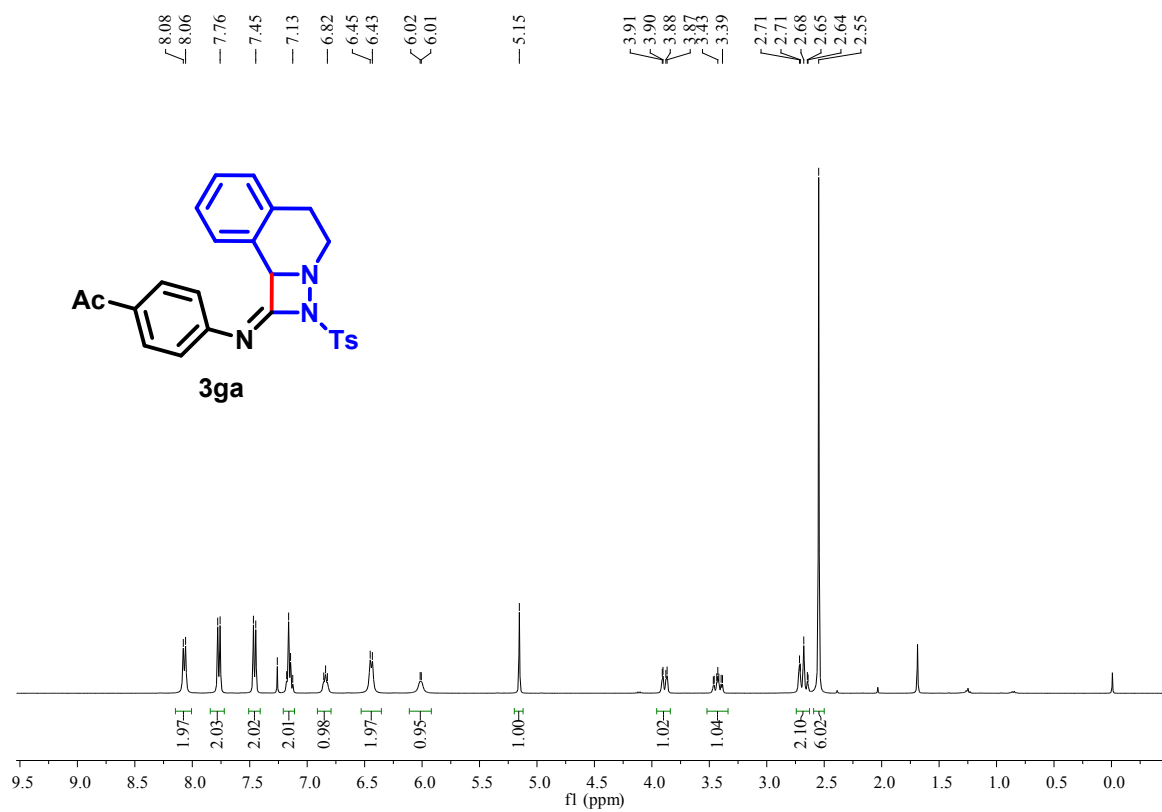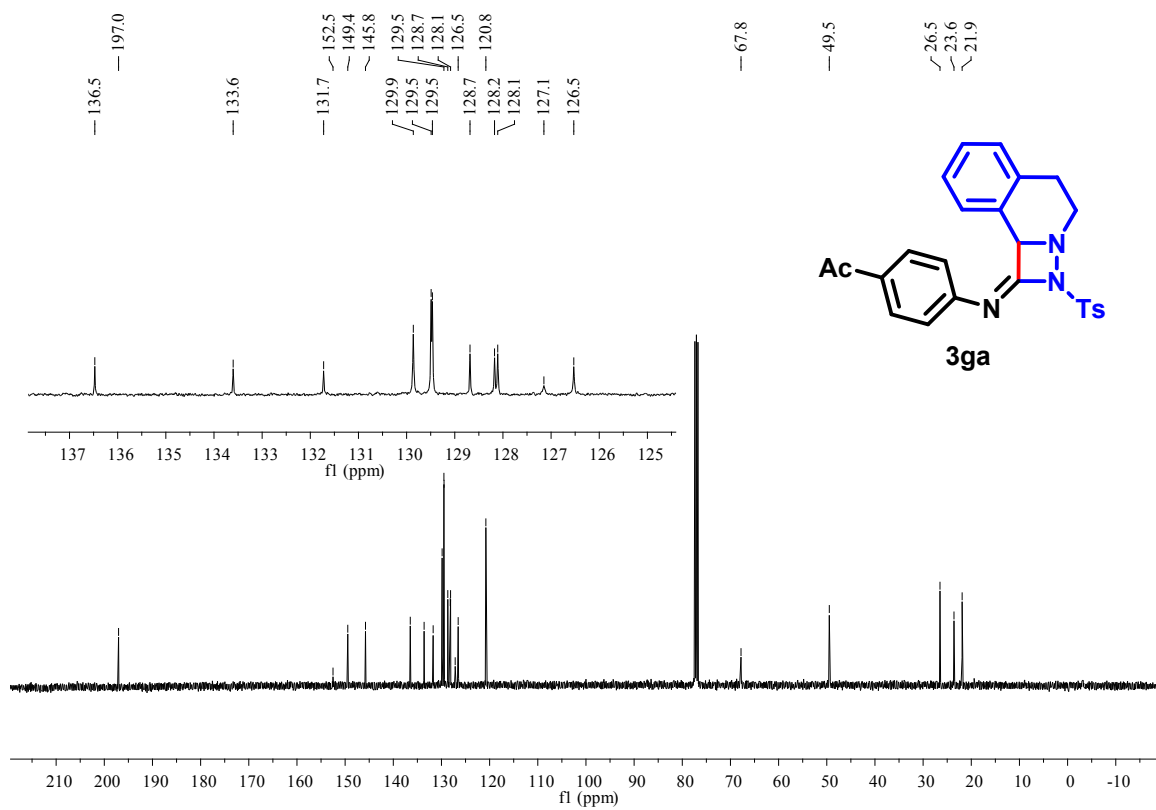

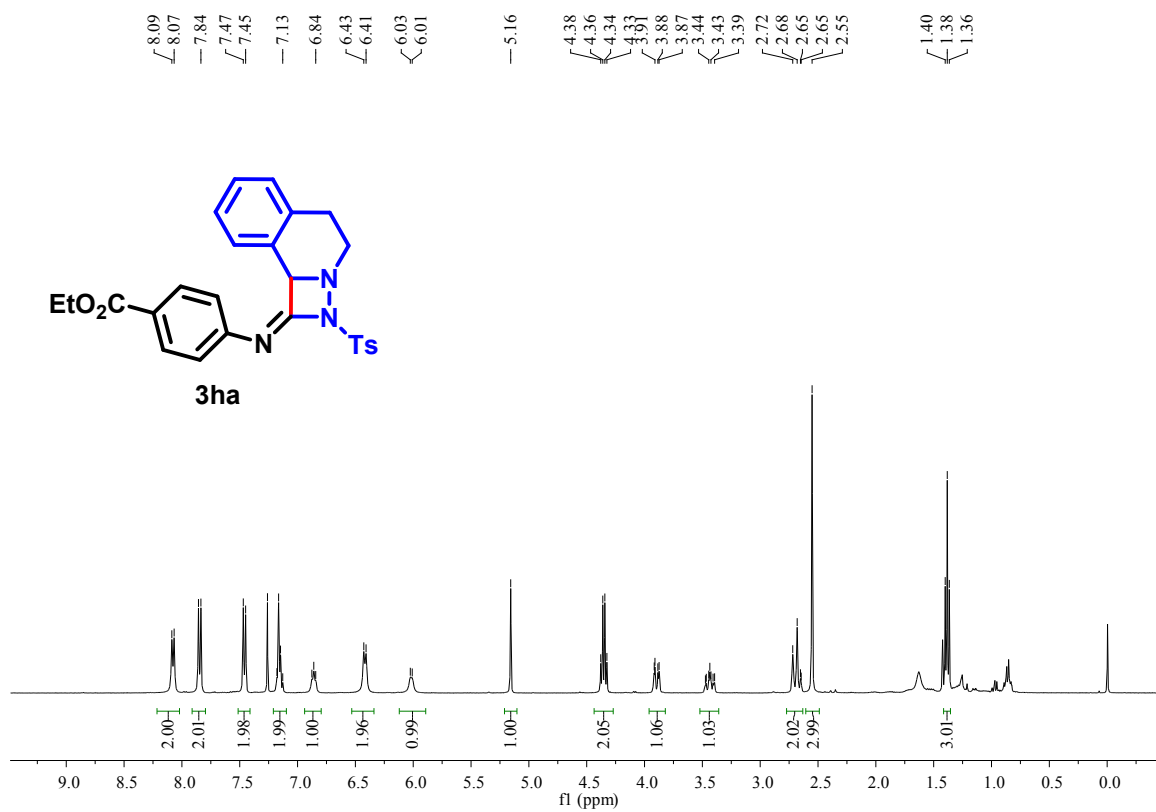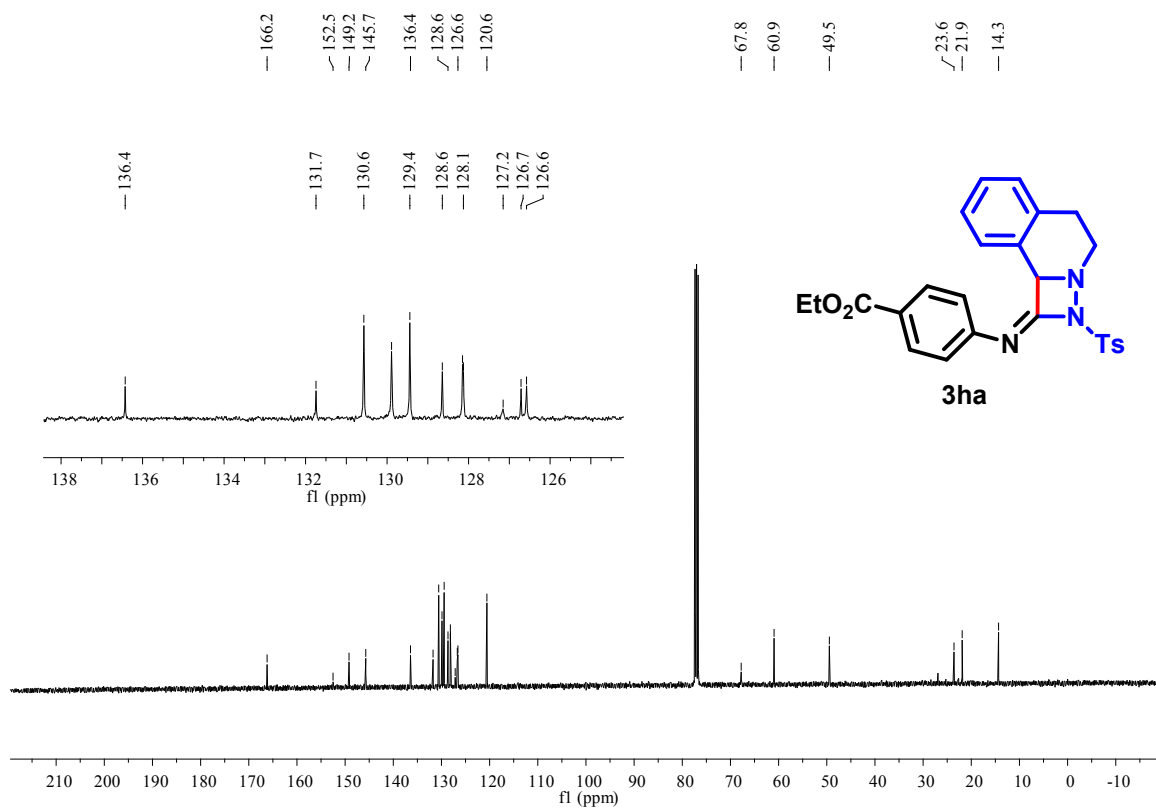

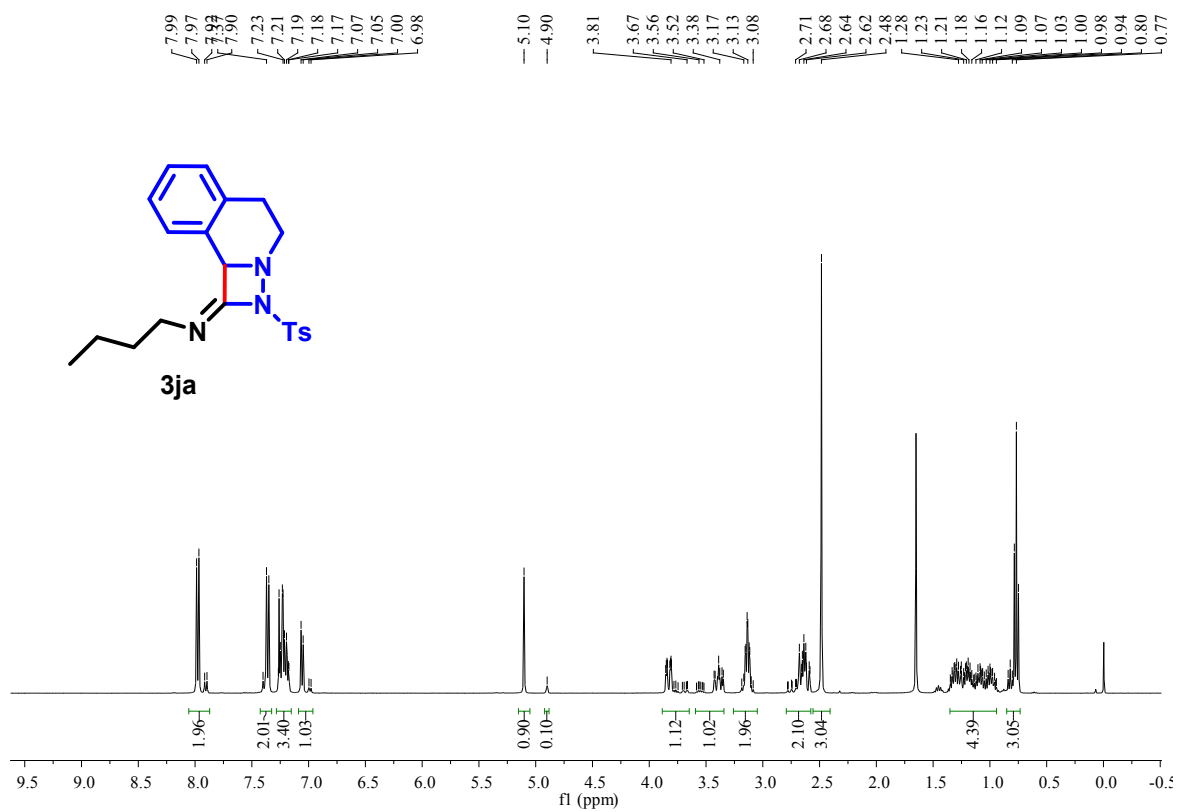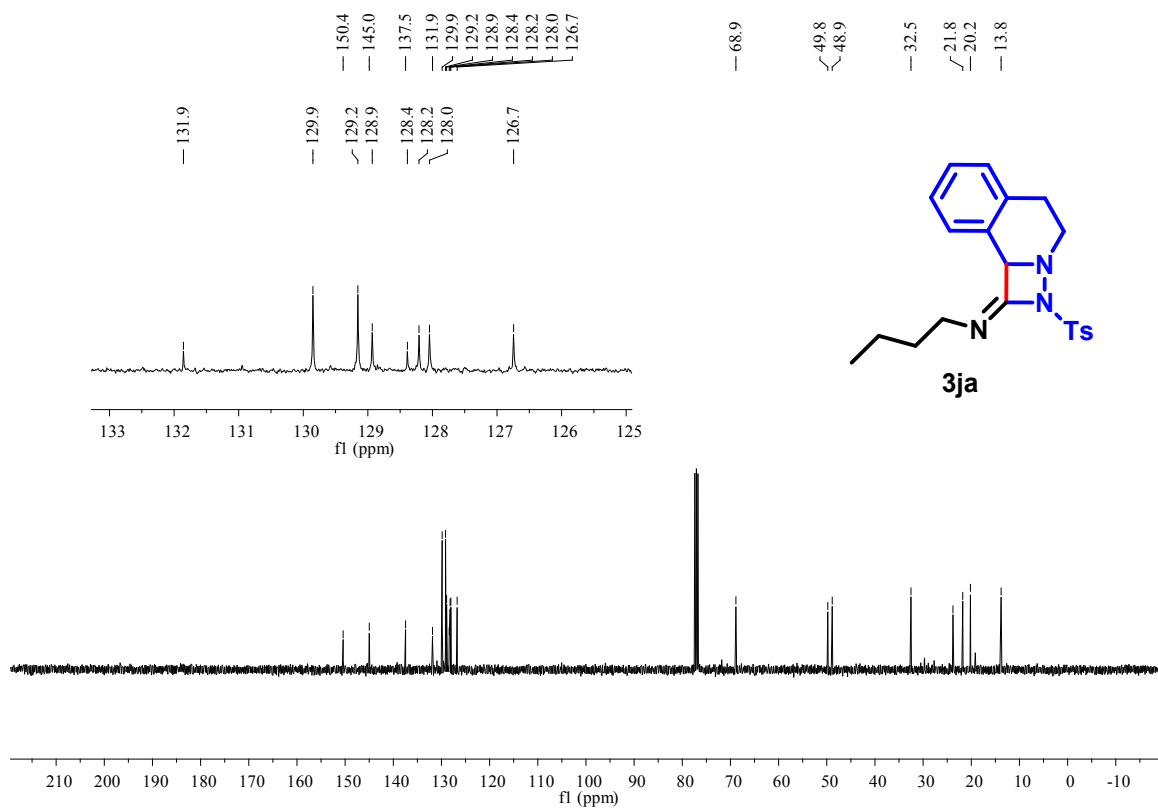

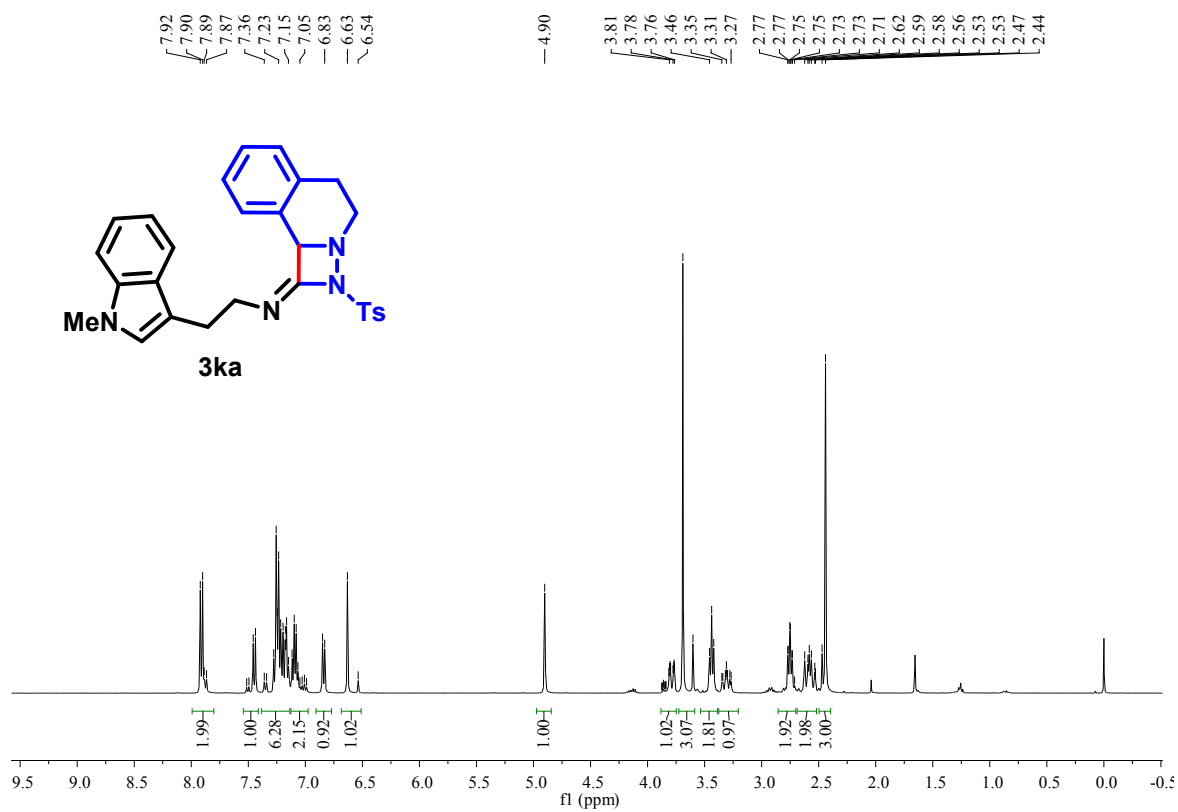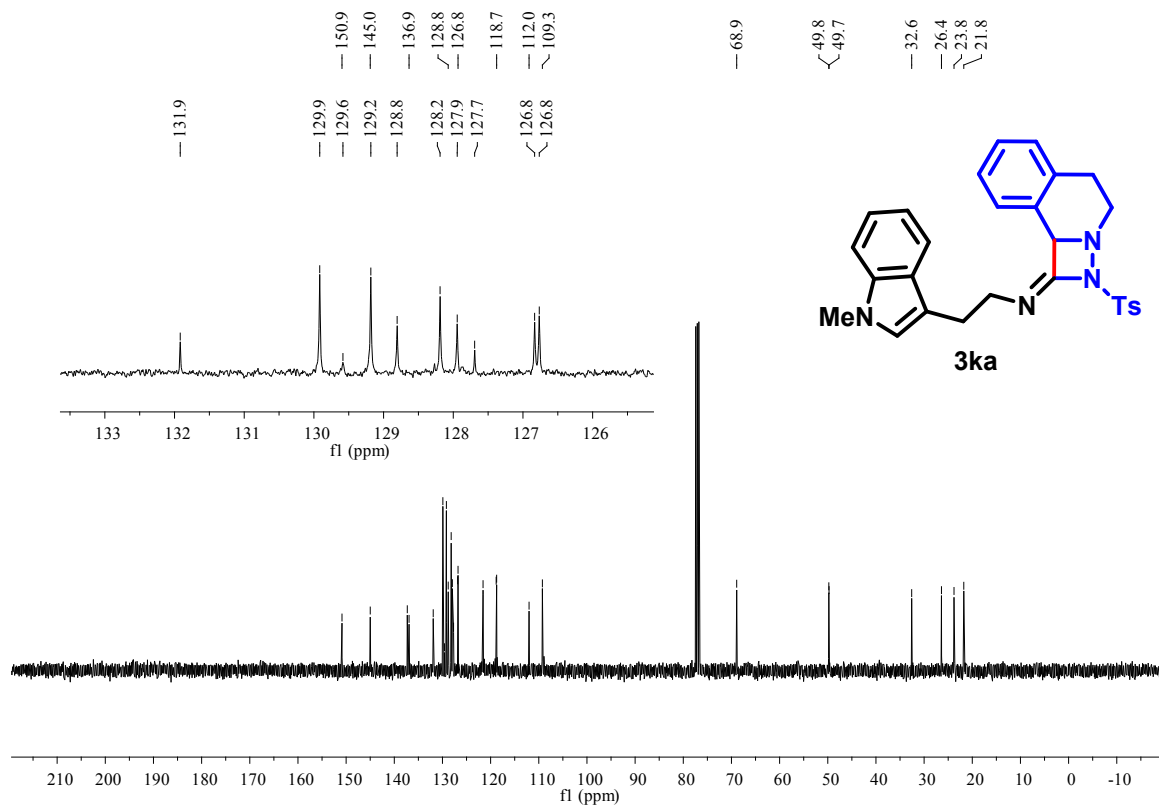

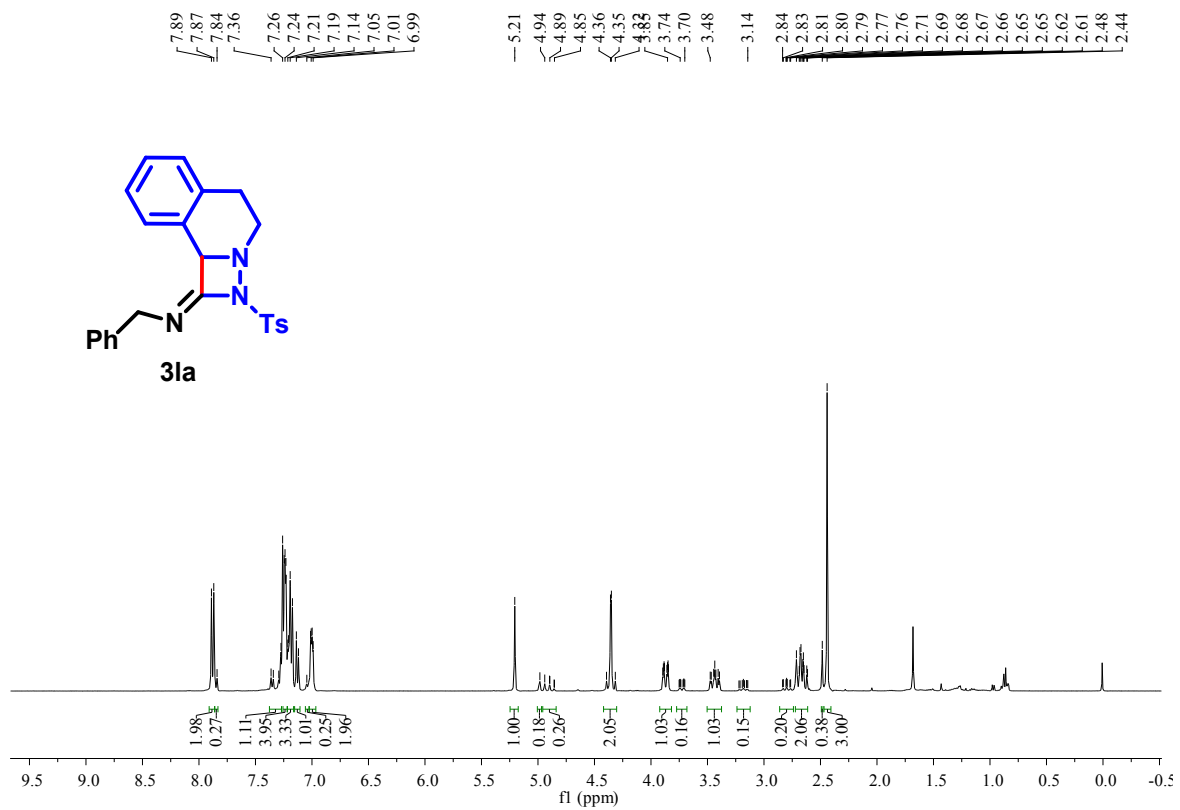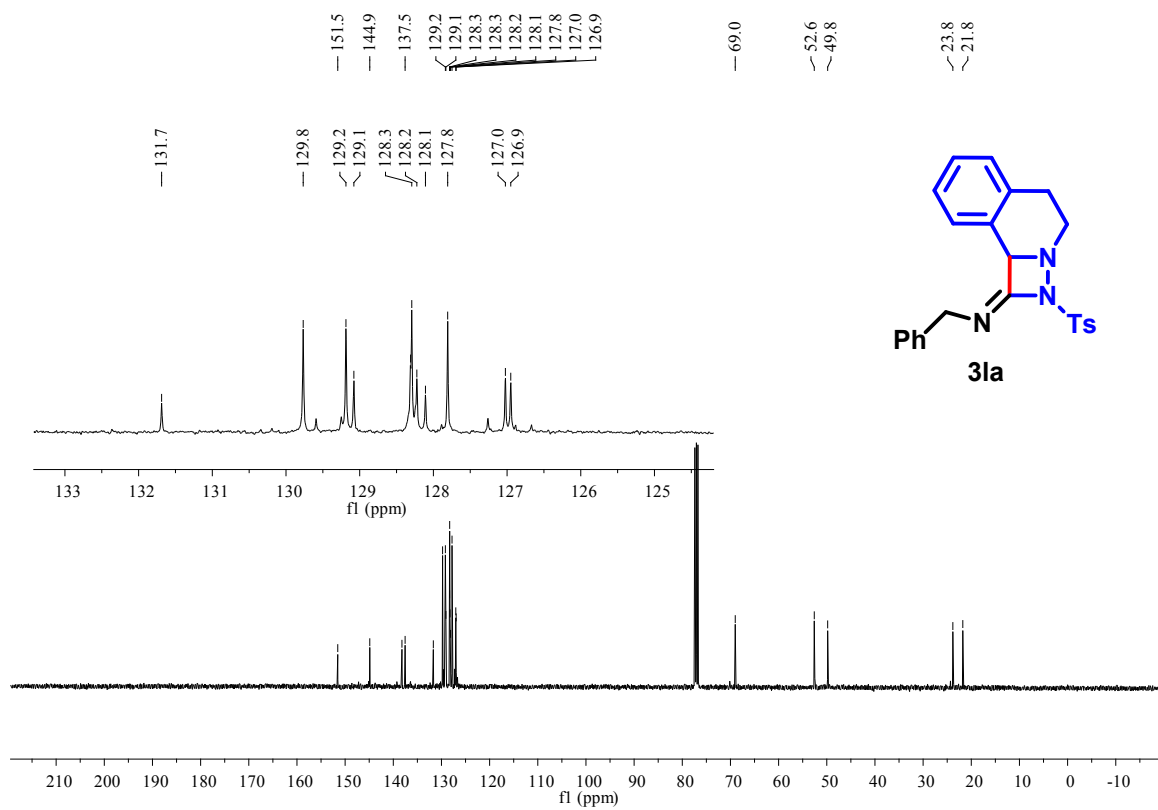

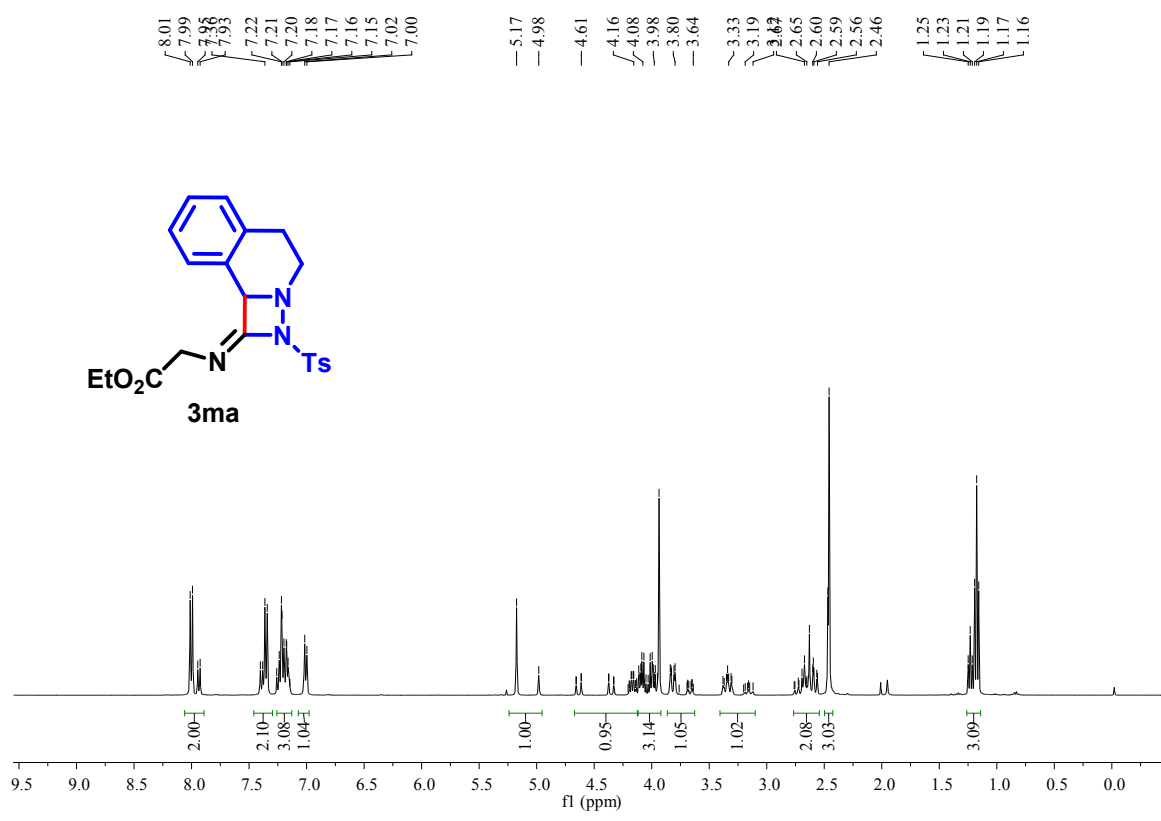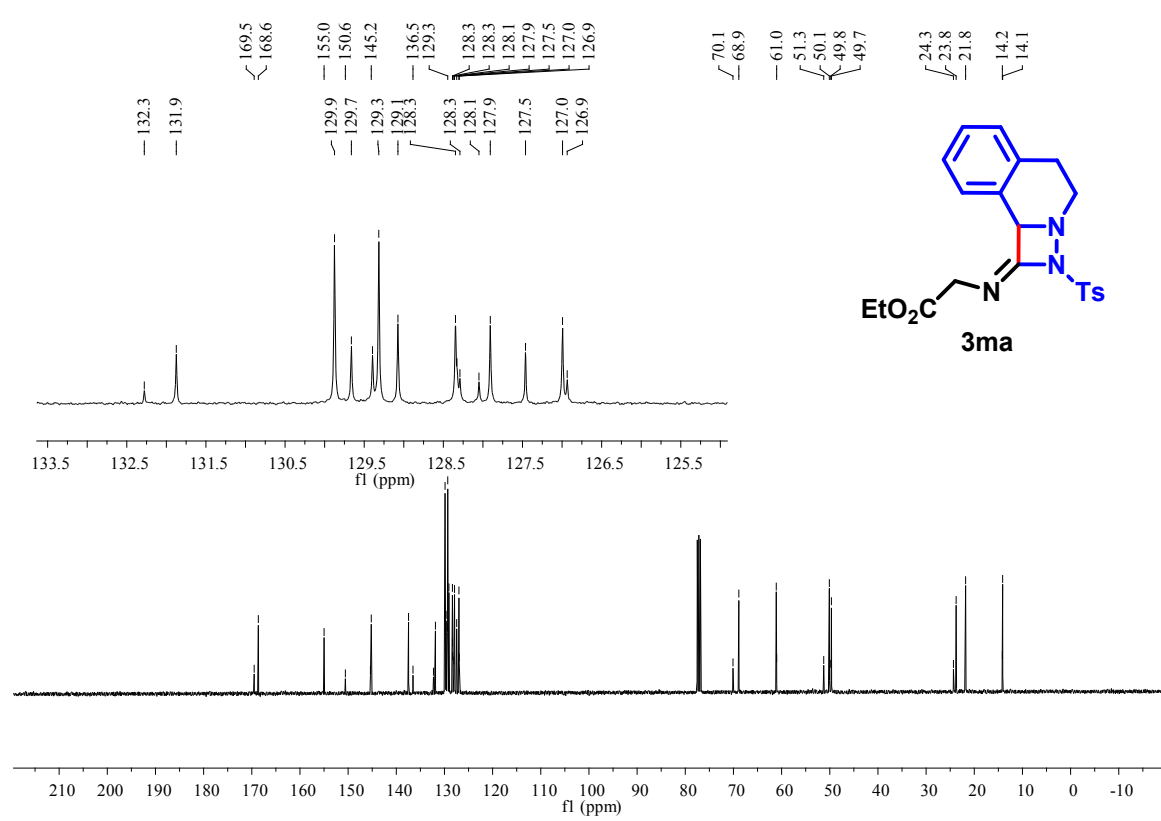



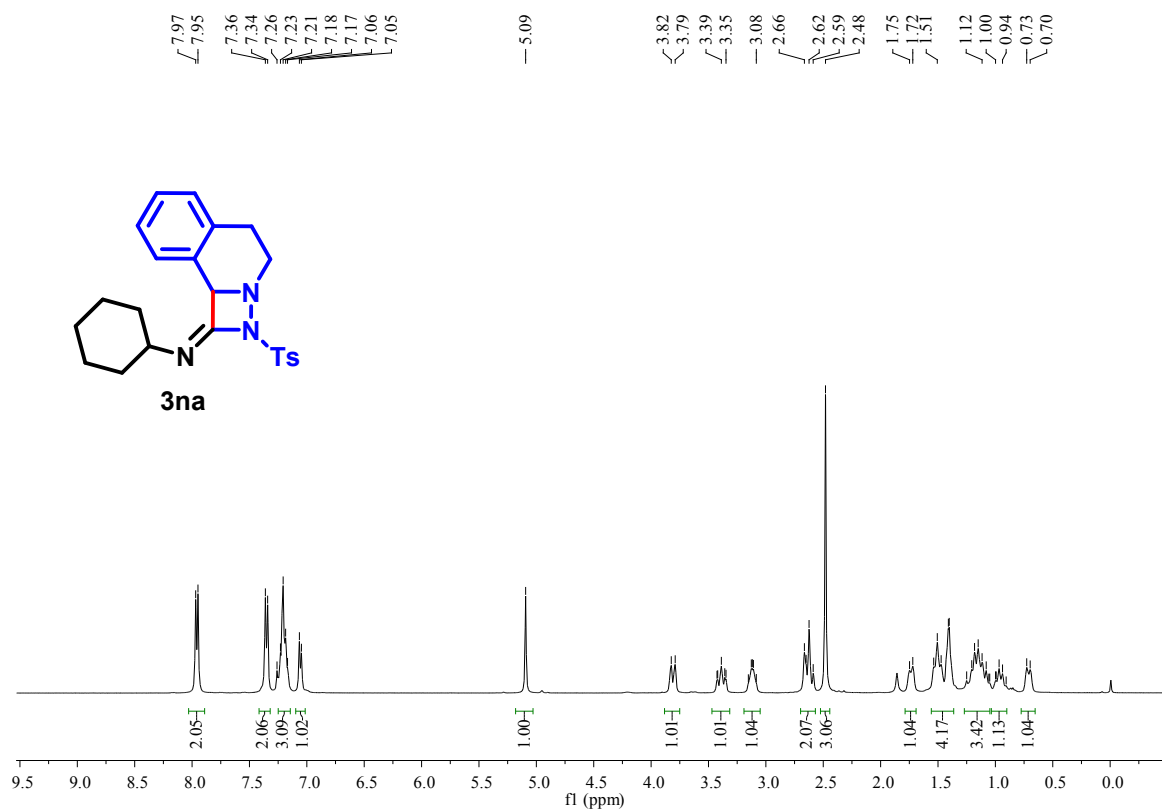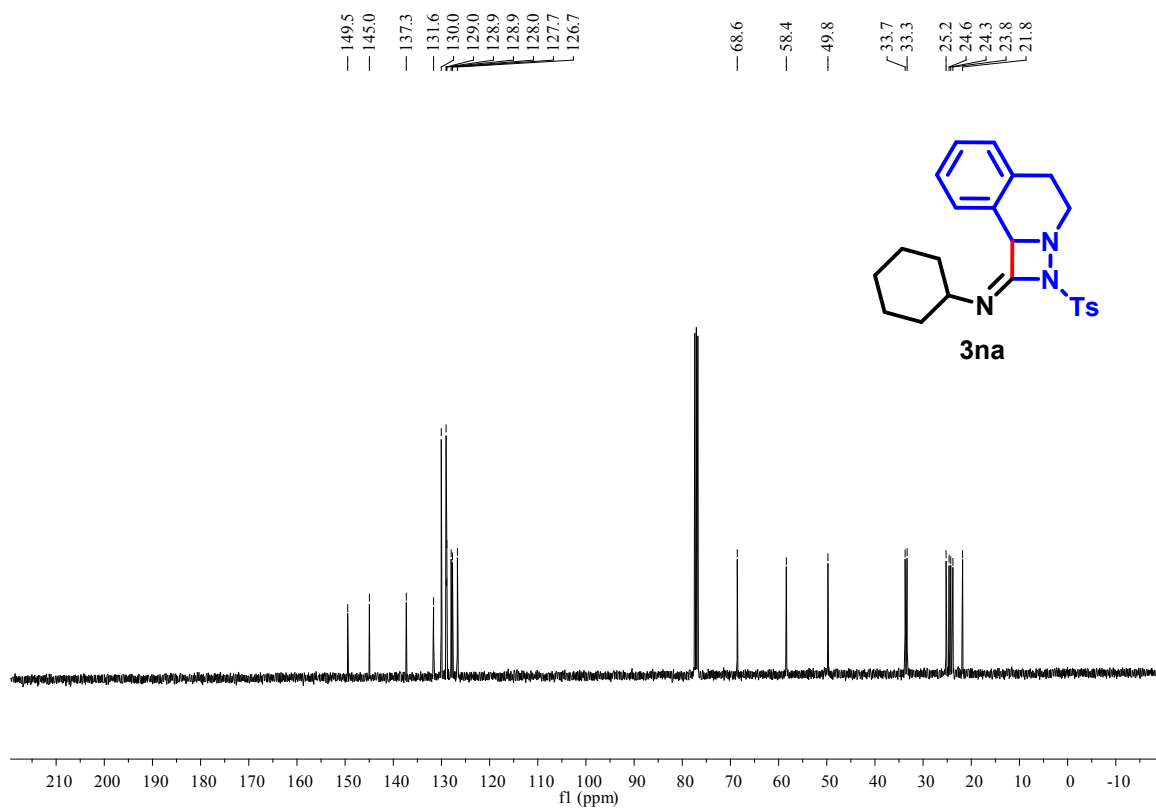

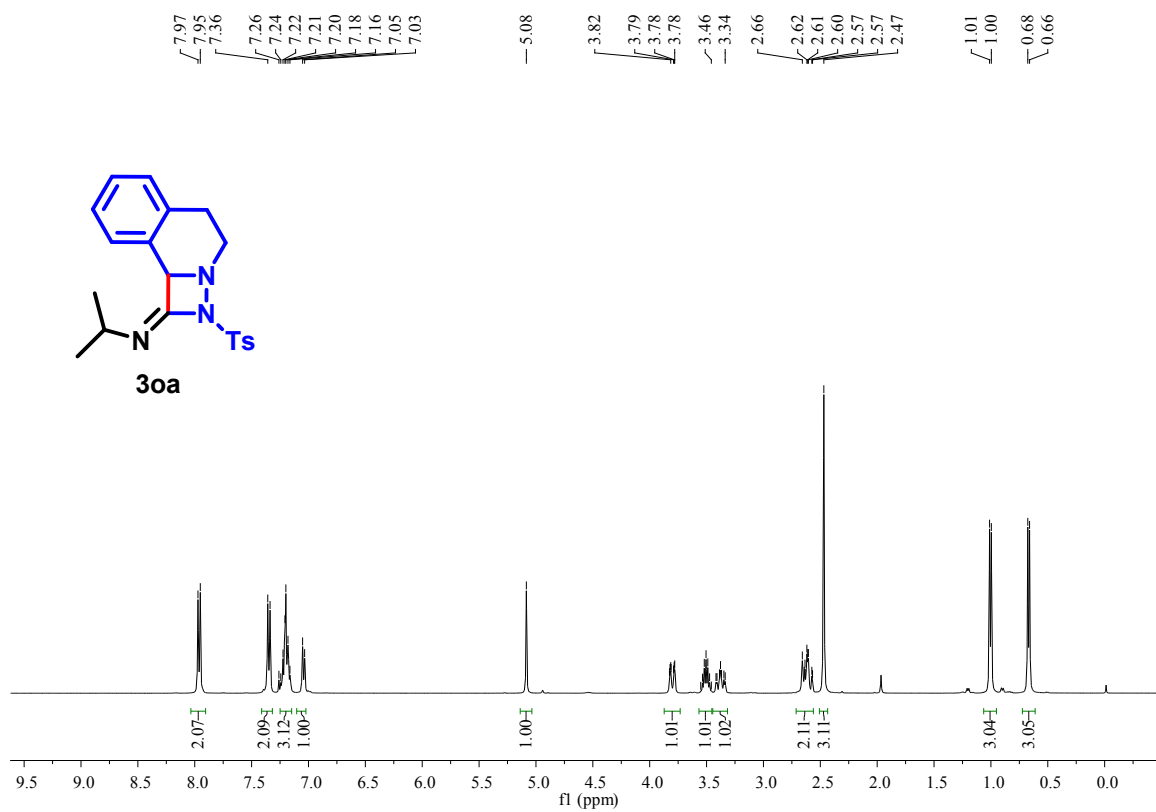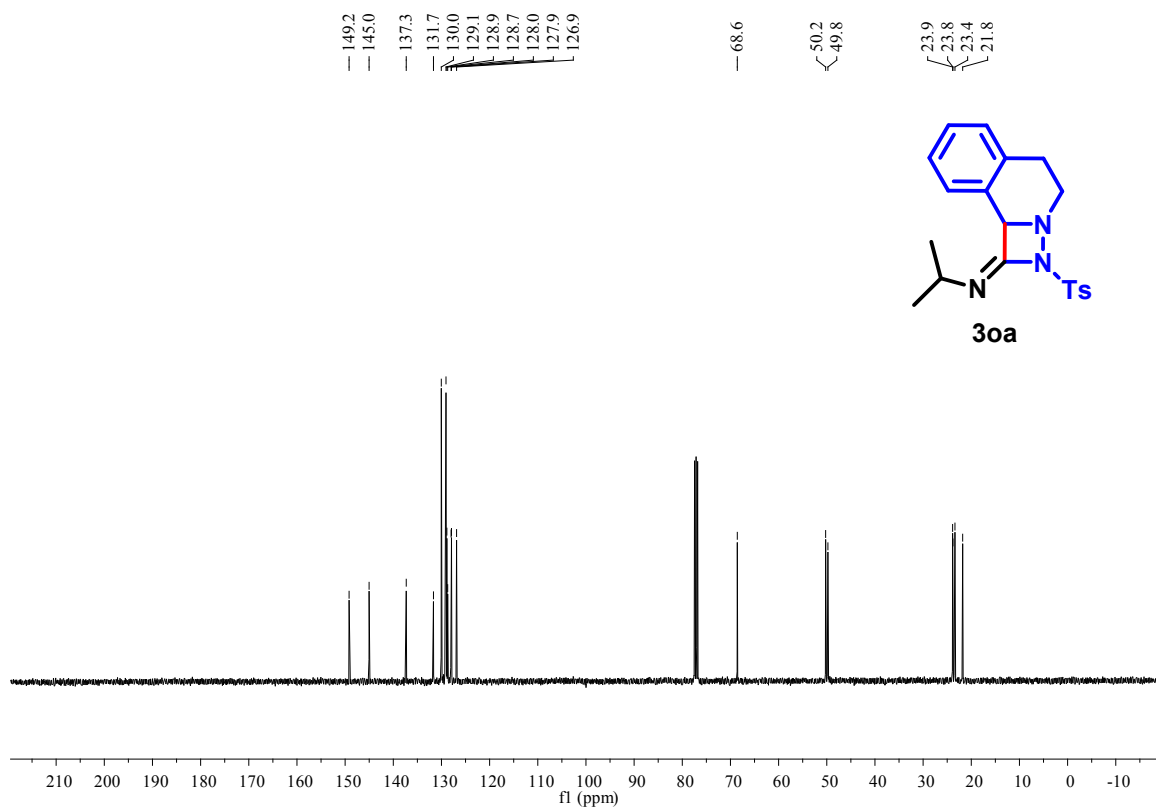

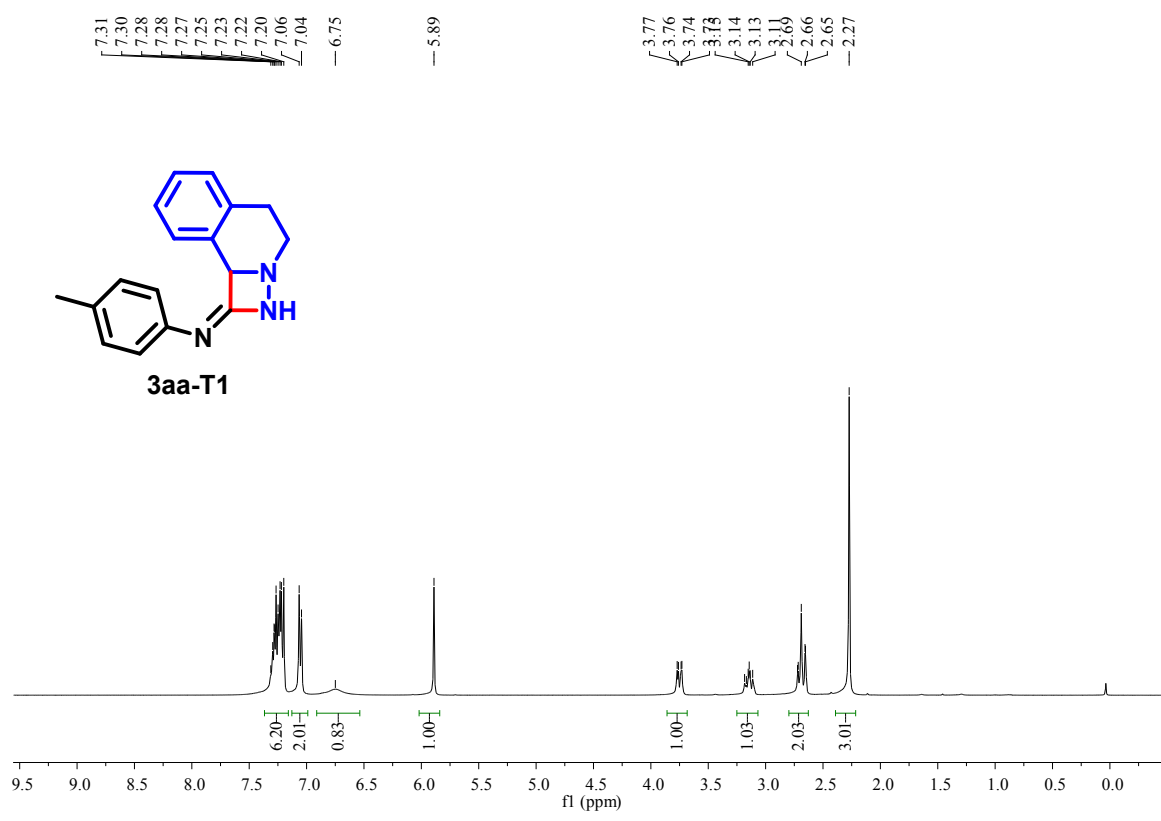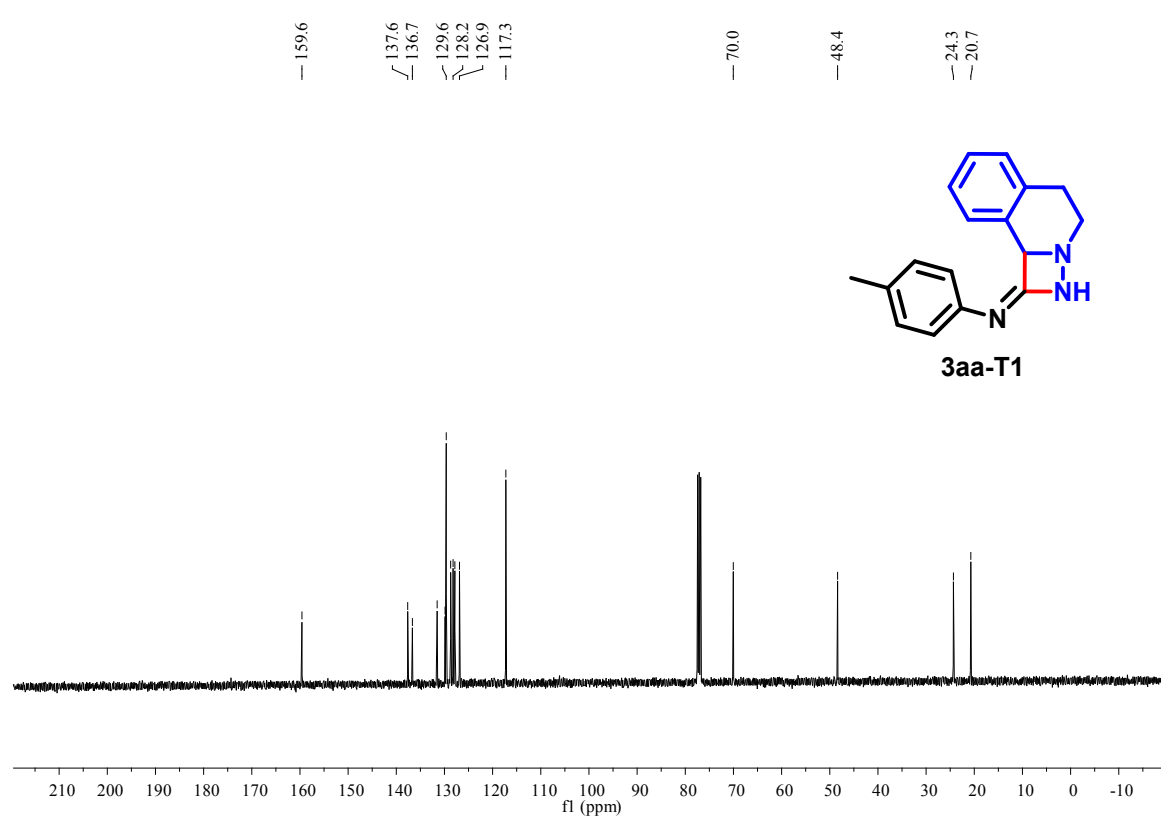

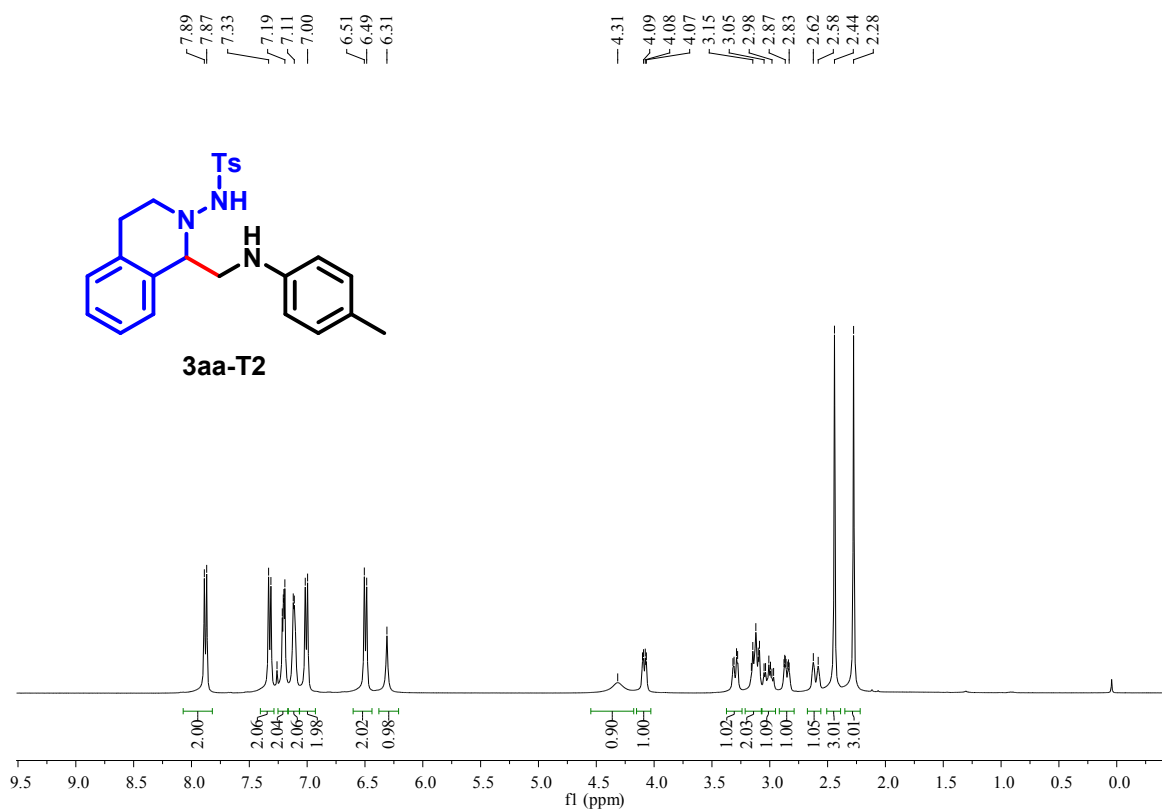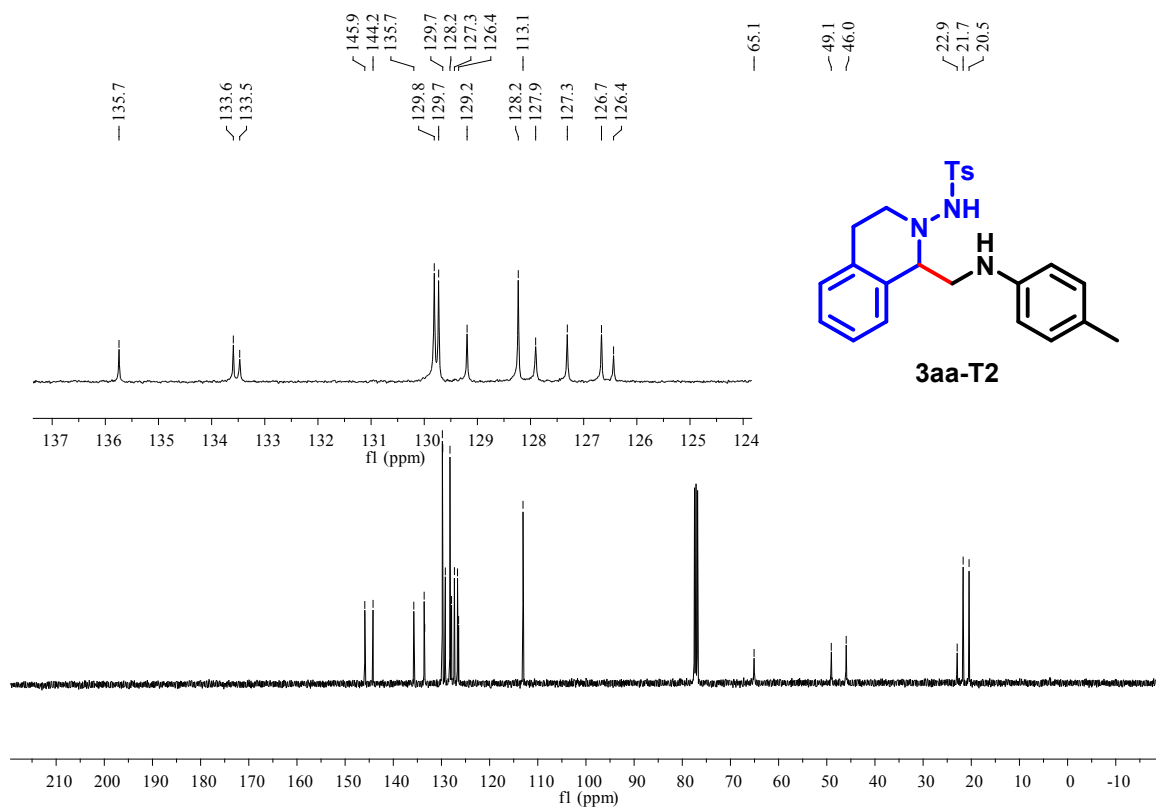

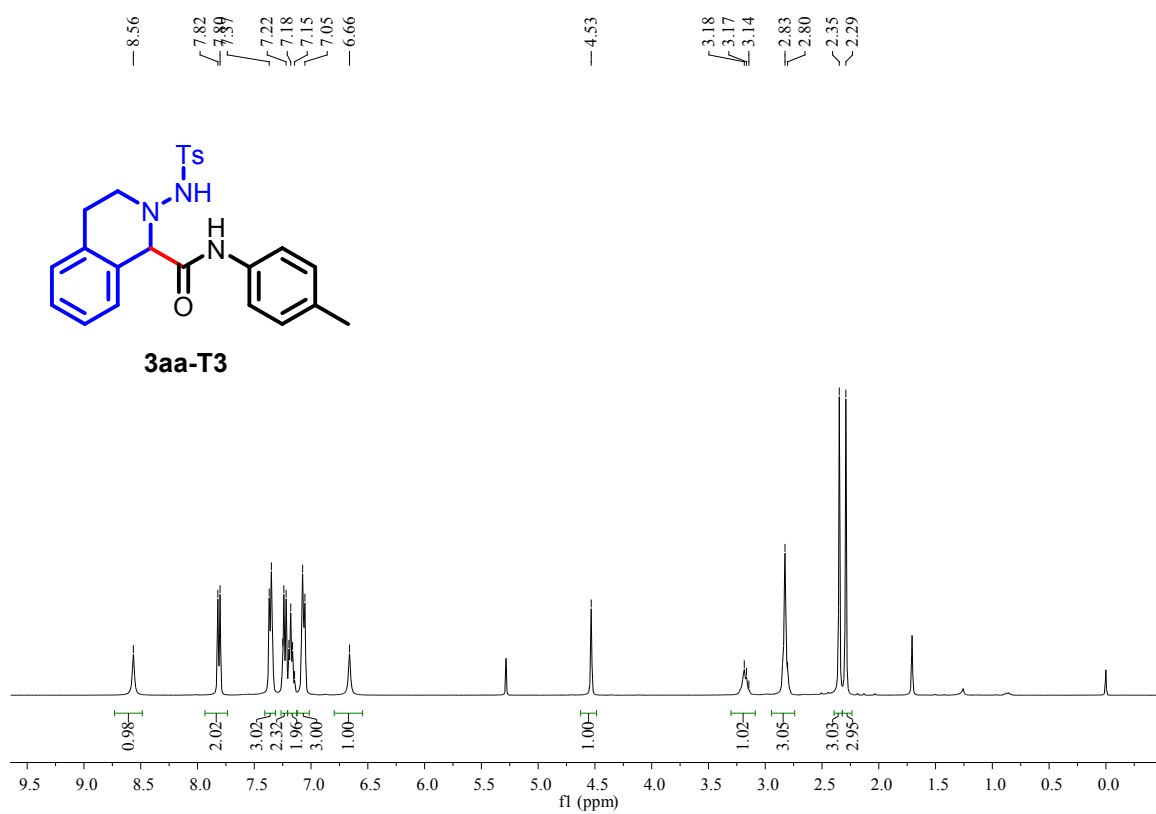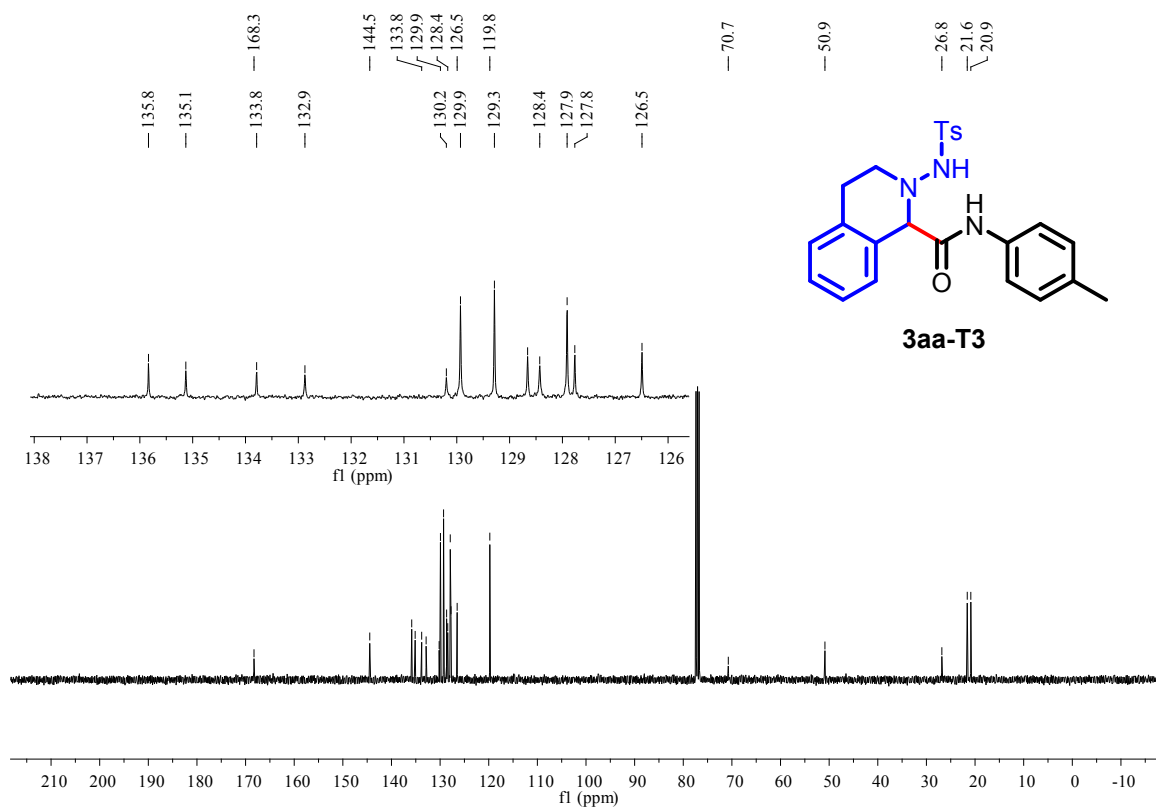

## 2. Crystal data and structure refinement

Compound **3ka**: (The crystal structure of compound **3ka** has been deposited at the Cambridge Crystallographic Data Centre (CCDC [2034479](https://www.ccdc.cam.ac.uk/conts/retrieving.html)). The data is available free of charge at [www.ccdc.cam.ac.uk/conts/retrieving.html](https://www.ccdc.cam.ac.uk/conts/retrieving.html).)

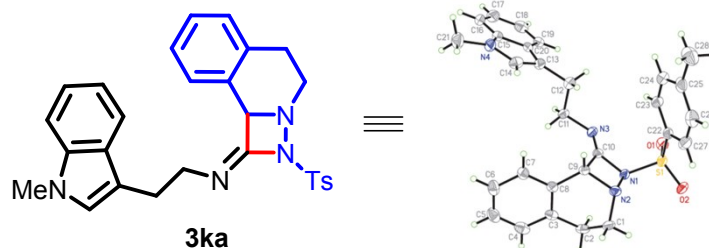

Crystal data and structure refinement for **3ka**.

|                                         |                                                                 |              |
|-----------------------------------------|-----------------------------------------------------------------|--------------|
| Empirical formula                       | C <sub>28</sub> H <sub>28</sub> N <sub>4</sub> O <sub>2</sub> S |              |
| Formula weight                          | 484.60                                                          |              |
| Temperature/K                           | 296                                                             |              |
| Wavelength                              | 0.71073 Å                                                       |              |
| Crystal system                          | monoclinic                                                      |              |
| Space group                             | P 21 P 21                                                       |              |
| Unit cell dimensions                    | a = 10.6532(6) Å                                                | α = 90 °     |
|                                         | b = 11.4210(7) Å                                                | β = 99.632 ° |
|                                         | c = 20.3231(13) Å                                               | γ = 90 °     |
| Volume/Å <sup>3</sup>                   | 2437.9 (3)                                                      |              |
| Z                                       | 4                                                               |              |
| Density (calculated) g/cm <sup>3</sup>  | 1.320                                                           |              |
| Absorption coefficient/mm <sup>-1</sup> | 0.167                                                           |              |
| F(000)                                  | 1024                                                            |              |
| Crystal size/mm <sup>3</sup>            | 0.20 × 0.15 × 0.10                                              |              |
| Theta range for data collection/°       | 2.335 to 27.551                                                 |              |
| Index ranges                            | -13 ≤ h ≤ 13, -14 ≤ k ≤ 14, -26 ≤ l ≤ 26                        |              |
| Reflections collected                   | 10854                                                           |              |
| Independent reflections                 | 6928 [R(int) = 0.0564]                                          |              |
| Completeness to theta = 25.242 °        | 99.2%                                                           |              |
| Absorption correction                   | Multi-scan                                                      |              |
| Data / restranits / parameters          | 10854/1/635                                                     |              |

|                                      |                                  |
|--------------------------------------|----------------------------------|
| Goodness-of-fit on $F^2$             | 1.016                            |
| Final R indices [ $I > 2\sigma(I)$ ] | $R_1 = 0.0564$ , $wR_2 = 0.0876$ |
| Final R indices [all data]           | $R_1 = 0.1224$ , $wR_2 = 0.1018$ |

Compound **3aa-T2**: (The crystal structure of compound **3aa-T2** has been deposited at the Cambridge Crystallographic Data Centre (CCDC 2054283). The data is available free of charge at [www.ccdc.cam.ac.uk/conts/retrieving.html](http://www.ccdc.cam.ac.uk/conts/retrieving.html).)

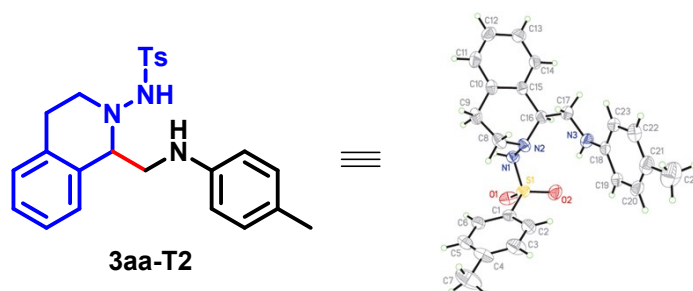

Crystal data and structure refinement for **3aa-T2**.

|                                         |                                                                                                                                          |
|-----------------------------------------|------------------------------------------------------------------------------------------------------------------------------------------|
| Empirical formula                       | $C_{24}H_{27}N_3O_2S$                                                                                                                    |
| Formula weight                          | 421.55                                                                                                                                   |
| Temperature/K                           | 296                                                                                                                                      |
| Wavelength                              | 0.71073 Å                                                                                                                                |
| Crystal system                          | triclinic                                                                                                                                |
| Space group                             | $P -1 P -1$                                                                                                                              |
| Unit cell dimensions                    | $a = 10.6667(5)$ Å $\alpha = 87.4762^\circ$<br>$b = 13.4081(7)$ Å $\beta = 79.9020^\circ$<br>$c = 16.0716(8)$ Å $\gamma = 81.4307^\circ$ |
| Volume/Å <sup>3</sup>                   | 2237.32(19)                                                                                                                              |
| Z                                       | 4                                                                                                                                        |
| Density (calculated) g/cm <sup>3</sup>  | 1.251                                                                                                                                    |
| Absorption coefficient/mm <sup>-1</sup> | 0.170                                                                                                                                    |
| F(000)                                  | 896.0                                                                                                                                    |
| Crystal size/mm <sup>3</sup>            | 0.60 × 0.40 × 0.36                                                                                                                       |
| Theta range for data collection/°       | 2.46 to 27.30                                                                                                                            |
| Index ranges                            | $-13 \leq h \leq 13$ , $-17 \leq k \leq 17$ , $-20 \leq l \leq 20$                                                                       |
| Reflections collected                   | 10257                                                                                                                                    |

|                                   |                                                   |
|-----------------------------------|---------------------------------------------------|
| Independent reflections           | 50241 [R(int) = 0.0348]                           |
| Completeness to theta = 25.242 °  | 99.7%                                             |
| Absorption correction             | Multi-scan                                        |
| Data / restranits / parameters    | 10257/0/557                                       |
| Goodness-of-fit on F <sup>2</sup> | 1.080                                             |
| Final R indices [I>2sigma(I)]     | R <sub>1</sub> = 0.0435, wR <sub>2</sub> = 0.0930 |
| Final R indices [all data]        | R <sub>1</sub> = 0.0700, wR <sub>2</sub> = 0.1022 |
